# Synapses learn to utilize pre-synaptic noise for the prediction of postsynaptic dynamics

David Kappel<sup>1,2</sup> and Christian Tetzlaff<sup>1,3</sup>

<sup>1</sup> Bernstein Center for Computational Neuroscience  
III Physikalisches Institut – Biophysik  
Georg-August Universität  
Friedrich-Hund-Platz 1, 37077 Göttingen

<sup>2</sup> Institut für Neuroinformatik  
Ruhr-Universität Bochum  
Universitätsstr. 150 NB 3/32  
44801 Bochum

<sup>3</sup> Department of Computational Synaptic Physiology  
Institute for Neuro- and Sensory Physiology  
University Medical Center Göttingen  
Von-Siebold-Str. 3A, 37075 Göttingen

April 22, 2022

## Abstract

Synapses in the brain are highly noisy, which leads to a large trial-by-trial variability. Given how costly synapses are in terms of energy consumption these high levels of noise are surprising. Here we propose that synapses use their noise to represent uncertainties about the activity of the post-synaptic neuron. To show this we utilize the free-energy principle (FEP), a well-established theoretical framework to describe the ability of organisms to self-organize and survive in uncertain environments. This principle provides insights on multiple scales, from high-level behavioral functions such as attention or foraging, to the dynamics of single microcircuits in the brain, suggesting that the FEP can be used to describe all levels of brain function. The synapse-centric account of the FEP that is pursued here, suggests that synapses form an internal model of the somatic membrane dynamics, being updated by a synaptic learning rule that resembles experimentally well-established LTP/LTD mechanisms. This approach entails that a synapse utilizes noisy processes like stochastic synaptic release to also encode its uncertainty about the state of the somatic potential. Although each synapse strives for predicting the somatic dynamics of its neuron, we show that the emergent dynamics of many synapses in a neuronal network resolve different learning problems such as pattern classification or closed-loop control in a dynamic environment. Hereby, synapses coordinate their noise processes to represent and utilize uncertainties on the network level in behaviorally ambiguous situations.

## Keywords

Free energy principle | Synaptic plasticity | Synaptic transmission | Uncertainty

## 24 1 Introduction

25 Synapses are inherently unreliable in transmitting their input to the post-synaptic neuron. For example,  
26 the probability of neurotransmitter release is typically around 50% [Katz, 1971, Oertner et al., 2002,  
27 Jensen et al., 2019] and can be as low as 20% *in vivo* [Borst, 2010]. In other words, up to 80% of  
28 synaptic transmissions fail due to release unreliability, providing one of the major sources of noise in  
29 the synapse. Pre- and post-synaptic noise sources result in a large trial-by-trial variability in the post-  
30 synaptic current (PSC) [Rusakov et al., 2020]. At the same time synapses are very demanding in  
31 terms of energy consumption [Pulido and Ryan, 2020], suggesting that a large portion of the body’s  
32 energy intake dissipates by the unreliability of synaptic transmission. Similar to biological synapses also  
33 neuromorphic technologies are exposed to noise culminating in unreliable synaptic transmission [Indiveri  
34 et al., 2013, van De Burgt et al., 2018, Grollier et al., 2020]. The functional implication of noisy synaptic  
35 transmission, whether it is a feature or bug in biological and artificial neuronal systems, is therefore highly  
36 debated [Maass, 2014, Aitchison et al., 2014, Neftci et al., 2016, Rusakov et al., 2020, Aitchison et al.,  
37 2021]. Here, we show that synapses can exploit noisy synaptic transmission to encode their uncertainty  
38 about the somatic membrane potential of the postsynaptic neuron. With each synapse doing this, we  
39 further show that this enables a neuronal network to encode and utilize uncertainties.

40 To establish this result we rely on a widely used model framework to describe biological systems  
41 that act in uncertain environments: the *free energy principle* (FEP). The FEP is based on the idea  
42 that biological systems instantiate an internal model of their environment that allows them to make  
43 predictions, take actions and to minimize surprise [Friston, 2010]. A mathematical formulation of surprise  
44 can be closely related to the physical notion of free energy, from which the FEP inherits its name. In  
45 the FEP formalism an agent uses internal states to form a model of its environment based on perceived  
46 stimuli (Fig. 1Ai). In general, these stimuli map only parts of the environment’s true state, implying  
47 an unavoidable residual level of uncertainty. To reduce the uncertainty, the agent performs actions  
48 to test its predictions about the environment. These actions may lead to new stimuli that provide  
49 feedback about the environment’s true state, triggering an update of the internal model. The FEP  
50 successfully explains biological mechanisms on various spatial and temporal scales, e.g. dendritic self-  
51 organization [Kiebel and Friston, 2011], network-level learning mechanism [Isomura and Friston, 2018],  
52 human behavior [Ramstead et al., 2016], and even evolutionary processes [Ramstead et al., 2018].

53 We apply the FEP to individual synapses, arguing that the dynamics of a synapse can be considered  
54 as an agent interacting with its cellular environment, and derive a synaptic learning rule by minimizing  
55 the free energy of individual synapses. This learning rule enables synapses to adapt their synaptic efficacy  
56 to best predict future postsynaptic spiking, which are registered by back-propagating action potentials  
57 (bAPs). In contrast to previous approaches (e.g. [Isomura et al., 2016]) that used the FEP to understand  
58 the influence of neuromodulatory signals such as Dopamine on synaptic plasticity, we focus here on  
59 unraveling the dynamics of a single synapse governed by only locally accessible quantities such as the pre-  
60 and postsynaptic-spike times and the current value of the synaptic efficacy. The derivation of the synaptic

61 dynamics relies on a small number of assumptions such that we could solve it in closed form. We call our  
62 new model the *synaptic free energy principle* (s-FEP). The emergent synaptic plasticity rule reproduces  
63 a number of experimentally observed effects of long-term potentiation (LTP) and depression (LTD)  
64 protocols and predicts precise forms for the influence of synaptic and neuron parameters. This result  
65 suggests that synapses probe their environment by sending stochastic synaptic currents and integrate the  
66 arriving feedback (bAPs) to update their internal state (synaptic efficacy) to better predict the somatic  
67 dynamics. Thus, every stochastic release event can be seen as a “*small experiment*”, that is based on  
68 previous experience and the outcome of which shapes subsequent future activity. In other words, as we  
69 show here, the task of a synapse to learn suitable synaptic responses can be considered as a problem  
70 of behaving in a partially unknown environment, where the synaptic noise is being used to properly  
71 represent the uncertainty of the synapse about the cellular, environmental state. On the network level,  
72 our computer simulations indicate that s-FEP allows several thousand synapses to exploit their synaptic  
73 noise to successfully master different learning paradigms despite ambiguous or uncertain inputs.

## 74 **2 Results**

75 After introducing the reasoning to link synaptic properties with the FEP and the fundamentals of the  
76 considered model (Section 2.1), we sketch the derivation of the resulting synaptic plasticity rule and  
77 compare it with experimental data (Section 2.2). We show that this plasticity rule coordinates the  
78 unreliability in synaptic transmission of a group of synapses to drive their joint postsynaptic neuron se-  
79 lectively in a deterministic or probabilistic way (Section 2.3). This successful coordination also functions  
80 in feedforward as well as recurrent neuronal networks allowing the system to decode reliably ambiguous  
81 stimuli (Section 2.4) or to behave in dynamic environments (Section 2.5).

### 82 **2.1 A synaptic account of the free energy principle**

83 The FEP provides a generic approach to model the behavior of an agent that interacts with its envi-  
84 ronment. The FEP’s main assumption is that the agent and the environment have physically separated  
85 states, that cannot directly influence another. Interaction between the agent’s (*internal*) and the envi-  
86 ronment’s (*external*) state only takes place through *actions* performed by the agent and *sensory feedback*  
87 provided by the environment (see Fig. 1Ai). The FEP suggests a specific method to solve the *internal*  
88 *state*  $\rightarrow$  *action*  $\rightarrow$  *external state*  $\rightarrow$  *feedback* -loop by minimizing the surprise caused by the sensory  
89 feedback. This renders an optimization problem that can be solved by maintaining an internal model  
90 of the environment, allowing the agent to reason about the true external state and its own uncertainty.  
91 Sensory feedback is used to update the internal model and state of the agent such that future actions  
92 better help the agent to predict the dynamics of the environment.

93 The FEP provides a mathematical formalism that can be applied to a wide range of systems of  
94 behaving agents and their environments. By employing the FEP on an individual synapse, we find that  
95 the interactions between agent and environment are very sparse such that sensory feedback and actions

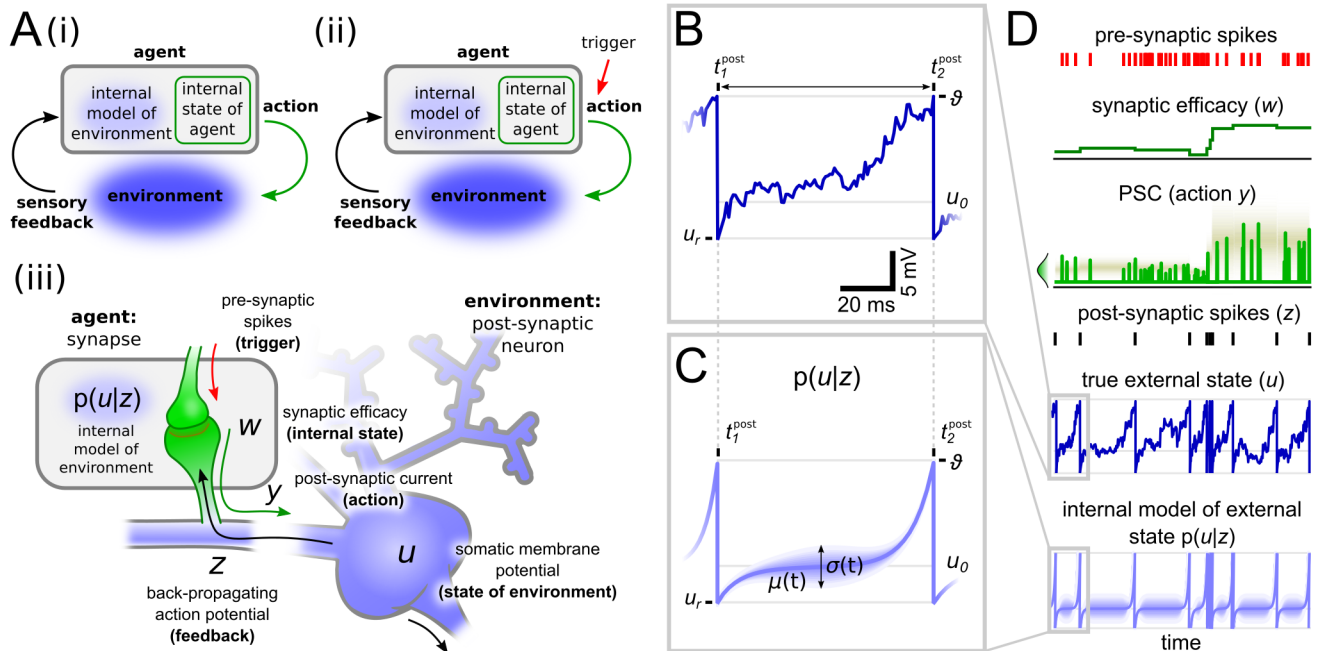

**Figure 1: The free energy principle for individual synapses.** **A:** i) The FEP considers an agent interacting with the environment through actions. Actions are determined by the agent's internal state. Sensory feedback from the environment to the agent is used to update the agent's internal model of the environment. ii) An additional, external trigger can be included into the framework from i) that determines when actions are initialized. iii) The framework shown in ii) can be transferred to a synapse that interacts with its postsynaptic soma. Relevant variables are the synaptic efficacy (internal state), the postsynaptic current (action), the somatic membrane potential (environmental state) of the postsynaptic neuron (environment), and the back-propagating action potential (feedback). **B:** A single trajectory of the somatic membrane potential  $u(t)$  between two action potentials. **C:** The internal synaptic model of the somatic membrane potential can be characterized by the stochastic bridge model providing the probability distribution  $p(u|z)$  about the value of  $u(t)$  between two postsynaptic spikes. Solid blue line shows the mean, variance indicated by shaded area. **D:** Illustration of relevant dynamics. Pre-synaptic input spikes (red) trigger synapses to release stochastic postsynaptic currents  $y$  (light green) with a mean and variance of amplitudes dependent on the synaptic efficacy  $w$  (dark green). Postsynaptic spike timings reach the synapse through bAPs  $z$ , constraining the internal model of the somatic membrane potential to the firing threshold  $\vartheta$  and then reset to  $u_r$  immediately after every bAP (see panel C). Between bAPs, the internal model estimates the probability density of the membrane potential according to the stochastic process  $(\mu(t), \sigma(t))$ .

96 only happen at specific time points. This suggests an event-based view on the FEP where actions (and  
97 feedback) are only provided at certain triggering times (Fig. 1Aii). This view allows us to separate  
98 the 'what' and 'when' information flow in the synapse model, which simplifies the analysis compared to  
99 previous applications of the FEP.

100 The intuition behind our synapse-centric s-FEP model is illustrated in Fig. 1Aiii. We consider  
101 the synapse as an agent and the postsynaptic neuron as its environment. We consider here as state  
102 variable of the neuron the somatic membrane potential  $u$ , as it determines the neuron's spiking behavior.  
103 However, as suggested by experimental findings [Cornejo et al., 2021], the actual value of the somatic  
104 membrane potential is hidden from the synapse and therefore the synapse has to infer the value of  $u$   
105 from the sparse information that propagates back from the soma into the dendrites. We consider that  
106 this sparse feedback is implemented by bAP events  $z$ , given by the firing times  $t_1^{\text{post}}, t_2^{\text{post}}, \dots, t_n^{\text{post}}, \dots$  of  
107 the postsynaptic neuron, neglecting propagation delays between soma and synapse. Thus, in this model  
108 the synapse only receives binary information about the true value of the somatic membrane potential  
109  $u$ . This information contains whether the somatic membrane potential has recently reached the firing  
110 threshold (if  $u(t = t_n^{\text{post}}) = \vartheta$ , then  $z(t = t_n^{\text{post}}) = 1$ ) or not (if  $u(t) < \vartheta$ , then  $z(t) = 0$ ). As introduced  
111 before, in the FEP formalism the feedback causes surprise that is being incorporated into the update of  
112 the internal model to better guide the agent's actions. These interrelations imply in the s-FEP model  
113 that bAPs  $z$  can trigger an update of the synapse yielding new synaptic actions.

114 The actions of a synapse to interact with the soma are given by the postsynaptic currents (PSCs)  
115  $y$  ('what') that are released in response to pre-synaptic spikes ('when'). In other words, in the s-FEP  
116 the pre-synaptic spikes operate as a trigger for the synapse to initialize an action implemented by PSCs  
117 (Fig. 1Aii and Aiii, red arrow). For simplicity we consider the PSC generation as a process of the whole  
118 synapse including pre- and postsynaptic mechanisms. Although individual synaptic mechanisms can have  
119 specific noise properties [Gontier and Pfister, 2020, Katz, 1971], we integrate pre- and postsynaptic noise  
120 sources into one Gaussian noise source that influences the amplitude of PSCs. Thus, at pre-synaptic  
121 spike times  $t = t^{\text{pre}}$  PSCs are drawn from a general normal distribution with mean and variance being  
122 scaled by the synaptic efficacy  $w$ , in accordance with experimental findings [Meyer et al., 2001].

$$y(t) \sim q(y(t) | w) \quad \text{with} \quad q(y(t) | w) = \mathcal{N}(y(t) | r_0 w, s_0 w), \quad (1)$$

123 where  $r_0 > 0$  and  $s_0 > 0$  are constants that scale the mean and variance of synaptic currents. At all other  
124 times the PSC equals zero (see Fig. 1D).  $q(y | w)$  determines the distribution over PSC amplitudes for  
125 a given synaptic internal state  $w$ .

126 To describe the relationship between the feedback and the true external state, the FEP suggests  
127 that the agent maintains an internal model of the environment. As the feedback is sparse in time and  
128 information (see above), the internal model makes use of a probability distribution over the likelihood of  
129 environmental states. This implies that the agent keeps track of its uncertainty about the true external  
130 state. In the FEP framework, in general, the environment is too complex to directly infer the external  
131 state given the feedback in terms of a posterior probability distribution [Buckley et al., 2017]. However,

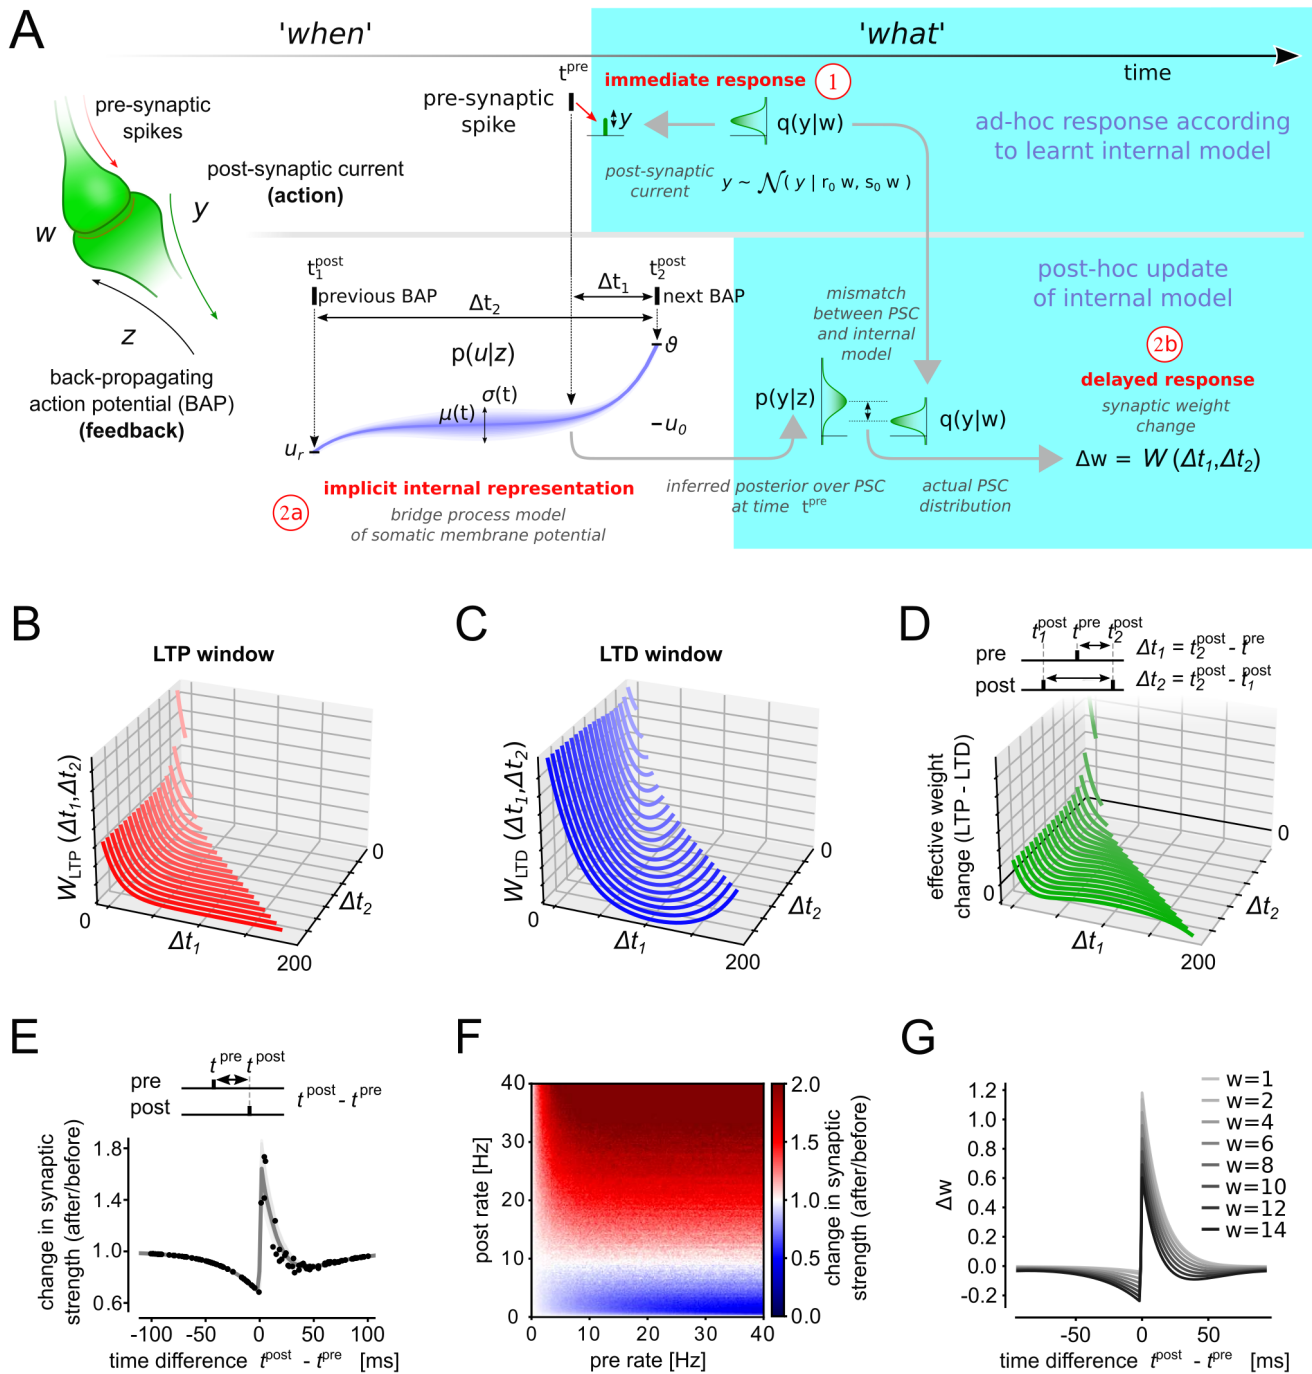

**Figure 2: The s-FEP learning rule resembles regulated triplet STDP.** **A:** Illustration of the main steps of the s-FEP synaptic learning model. **B,C:** The triplet STDP windows  $W_{LTP}$  (A) and  $W_{LTD}$  (B) that emerge from s-FEP as a function of the spike timing differences  $\Delta t_1$  and  $\Delta t_2$ . **D:** The effective synaptic efficacy changes that result from the LTP and LTD windows. **E:** Mean synaptic efficacy changes (gray line) and individual trials (black dots) for an STDP pairing protocol. Shaded area indicates variance over trials. **F:** synaptic efficacy changes as a function of pre- and post- rate. **G:** Weight dependence of the s-FEP learning rule for a fixed  $\Delta t_2=200$  ms plotted as STDP curve as in (E).



132 we find that for the s-FEP we can express this distribution  $p(u | z)$  directly in closed form by considering  
133 the so-called stochastic bridge model [Corlay, 2013] to approximate the somatic membrane dynamics  $u(t)$   
134 (see Supplementary Text A.2 for more details).

135 To do so, we have to remind ourselves of the fact that a bAP at time  $t = t_1^{\text{post}}$  conveys the information  
136 to a synapse that the postsynaptic, somatic membrane potential has just reached the firing threshold  
137  $u(t = t_1^{\text{post}}) = \vartheta$ . To describe the membrane dynamics between any two bAPs at  $t_1^{\text{post}}$  and  $t_2^{\text{post}}$ , we can  
138 utilize that the synaptic uncertainty about the true membrane potential is minimal close to the spike  
139 times and maximal between both spikes at  $\frac{t_2^{\text{post}} - t_1^{\text{post}}}{2}$ . Such an event-based time course of the uncertainty  
140 is captured by the stochastic bridge model that determines the distribution of  $u(t)$  given  $z$  through time-  
141 varying mean and variance functions  $\mu(t)$  and  $\sigma^2(t)$ , respectively. Importantly, the shape of  $\mu(t)$  and  
142  $\sigma^2(t)$  between any pair of postsynaptic spikes depends only on the interspike interval  $t_2^{\text{post}} - t_1^{\text{post}}$ . Fig. 1C  
143 shows the solution of the stochastic bridge model for  $t_2^{\text{post}} - t_1^{\text{post}} = 100$  ms that sufficiently captures real  
144 membrane dynamics (see Fig. 1B for one example). In other words, we can use the stochastic bridge  
145 model to describe the internal representation that the synapse maintains about the somatic membrane  
146 dynamics. In the next section we will show that the stochastic bridge model can also be used to infer  
147 biologically plausible synaptic plasticity rules to adapt the synaptic efficacies  $w$ , implying an update of  
148 the internal model of the synapse.

## 149 2.2 Synaptic plasticity as free energy minimization

150 Learning in the s-FEP means to adapt the synaptic efficacy  $w$  to minimize the "surprise" caused by  
151 bAPs  $z$ , where surprise is measured with respect to the synapse's internal model of the soma  $p(u | z)$ .  
152 In other words, the feedback  $z$  triggers an update of the internal state of the synapse  $w$ . This update  
153 changes the actions of the synapse, namely the PSC amplitudes  $y$ . The changed actions in turn adapt  
154 the dynamics of the somatic membrane potential and, thus, the firing of the postsynaptic neuron that  
155 is fed back to the synapse by bAPs  $z$ . To better understand this loop, we split the effect of the synaptic  
156 efficacy into (1) an immediate and (2) a delayed response that are triggered by pre- and post-synaptic  
157 firing. Using the event-based view of the s-FEP (Fig. 1Aii), each of these responses can be divided into  
158 a 'when' and a 'what' part. Both responses together determine the adaptation of the synaptic efficacy.  
159 The complete process of the synaptic efficacy update  $\Delta w$  is illustrated in Fig. 2A.

160 The immediate response (1) determines the action  $y$  of the synapse. At the time of pre-synaptic firing  
161  $t^{\text{pre}}$  ('when') a PSC amplitude is generated by drawing a value for  $y$  from the distribution  $q(y | w)$  given in  
162 Eq. (1) ('what'). The synaptic efficacy  $w$  determines both, the mean and variance of  $y$ . The mathematical  
163 formulation could be extended comprising two parameters that determine mean and variance separately,  
164 but is not investigated here. The immediate response  $y$ , in other words, constitutes an ad-hoc guess  
165 about the firing behavior of the postsynaptic neuron, based on past experience encoded in  $w$ , before  
166 more information is provided by further bAPs ( $z$ ).

167 The actual update of the synaptic efficacy happens during the delayed response (2). After a further  
168 bAP has arrived, the internal model  $p(u | z)$  is used to update  $w$  such that the distribution  $q(y | w)$

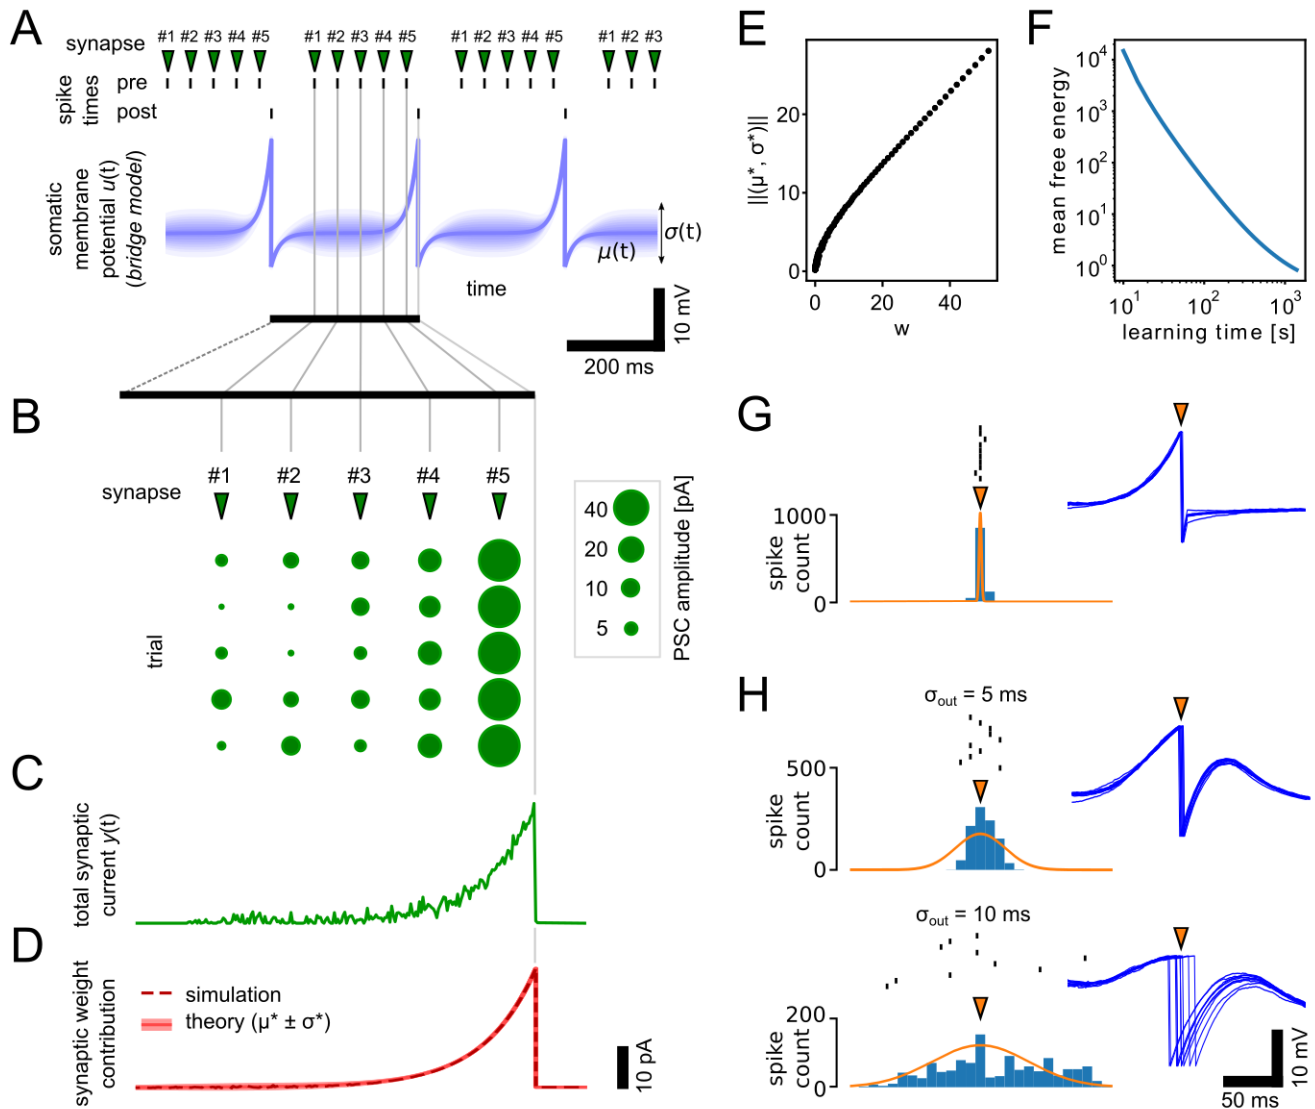

**Figure 3: Synapse-level probability matching.** **A:**  $\mu(t)$  and  $\sigma(t)$  of the somatic membrane potential given the stochastic bridge model for a neuron that is brought to fire with a spike interval of 300 ms. Pre-synaptic neurons were brought to fire at fixed time offsets relative to the post-synaptic spikes. **B:** Synapses learn to inject the optimal current that matches the bridge model in (A). Individual current pulses are shown for multiple trials for synapses with different time offsets. **C:** The combined effect of all synapses shown by the summed input current for a single trial. **D:** Synaptic efficacies after learning and weight means and variances predicted by the theory. **E:** Synaptic efficacies after learning are correlated with the euclidean norm of the theoretically derived  $\mu^*$  and  $\sigma^*$  (see panel D). **F:** The mean free energy over all synapses declines throughout learning. **G:** Firing behavior of the neuron after learning when allowed to fire freely in response to input spikes. 10 individual spike times are shown together with histograms over 1000 trials. Insets show membrane dynamics during the 10 trial runs. Orange arrow indicates spike time during learning. **H:** As in (G) but here the output spike times were given by Gaussian distributions of different spreads. Orange arrow indicates here the mean.



169 (immediate response) better reflects (or predicts) the postsynaptic firing behavior. The 'when' part of  
 170 this update is determined by pre- and post-synaptic firing times. Hereby, the internal model  $p(u | z)$   
 171 is used to align the relative timing of pre- and post-synaptic firing. This information is then used to  
 172 estimate the distribution over values of  $u$  ('what') from which the weight update is inferred. The delayed  
 173 response thus constitutes a post-hoc correction of the PSC probability distribution  $q(y | w)$ .

174 To understand the actual weight update mathematically we have to divide the delayed response  
 175 (2) into two sub-problems: (2a) We have to invert the internal model  $p(u | z)$  to obtain a posterior  
 176 distribution  $p(y | z)$  over synaptic currents  $y$  that most likely lead to a desired spiking behavior (measured  
 177 by  $z$ ). (2b) Then we have to reduce the distance between the inferred posterior distribution  $p(y | z)$  and  
 178 the actual distribution over PSCs  $q(y | w)$  used in the immediate response (1) to update the synaptic  
 179 efficacy  $w$ .

180 To solve the first sub-problem (2a) we make use of the internal model  $p(u | z)$  to directly infer PSCs  
 181 that are compatible with a given spiking behavior  $z$ . In Supplementary Text A.3 we show that  $p(y | z)$   
 182 can be analytically expressed using the stochastic bridge model to describe  $p(u | z)$ . The resulting  
 183 solution of the posterior distribution is given by a Gaussian distribution with time-varying mean and  
 184 variance function  $m$  and  $v$ , respectively. At any time  $t = t^{\text{pre}}$  the posterior over  $y(t)$  can thus be written  
 185 as

$$p(y(t) | z) = \mathcal{N}(y(t) | m(\Delta t_1, \Delta t_2), v(\Delta t_1, \Delta t_2)) , \quad (2)$$

186 where  $\Delta t_1 = t_2^{\text{post}} - t^{\text{pre}}$  and  $\Delta t_2 = t_2^{\text{post}} - t_1^{\text{post}}$  are the relative firing times. This distribution has the  
 187 property, that it generates PSCs  $y$  that will, with high probability, result in a spiking behavior  $z$  when  
 188 injected into the post-synaptic neuron. Importantly, the functions  $m$  and  $v$  only depend on  $\Delta t_1, \Delta t_2$ .

189 To solve sub-problem (2b), we can use Eqs. (1) and (2), to directly minimize the distance  $\mathcal{D}(q|p)$   
 190 between  $q(y | w)$  and  $p(y | z)$ . To do so it is sufficient to consider the relative firing times  $\Delta t_1 = t_2^{\text{post}} - t^{\text{pre}}$   
 191 and  $\Delta t_2 = t_2^{\text{post}} - t_1^{\text{post}}$  (see Fig. 2A-D). Hereby,  $\Delta t_1$  and  $\Delta t_2$  can be linked to learning windows of spike-  
 192 timing-dependent plasticity (STDP, Fig. 2B,C). These learning windows implicitly encode the relevant  
 193 dynamics of the stochastic bridge model, and thus the internal model does not have to be encoded explicit  
 194 in every synapse. The synaptic efficacy updates can then be expressed in the form (see Supplementary  
 195 Text A.4 for a detailed derivation)

$$\Delta w = -\frac{\partial}{\partial w} \mathcal{D}(q|p) = W_{\text{LTP}}(\Delta t_1, \Delta t_2) - \left(\frac{1}{2} + w\right) W_{\text{LTD}}(\Delta t_1, \Delta t_2) + \frac{1}{2w} \quad (3)$$

196 where  $W_{\text{LTP}}(\Delta t_1, \Delta t_2) \geq 0$  and  $W_{\text{LTD}}(\Delta t_1, \Delta t_2) \geq 0$  are triplet STDP learning windows that depend only  
 197 on the relative timing  $\Delta t_1$  and  $\Delta t_2$  of pre- and post-synaptic firing, and where  $w$  denotes the current  
 198 value of the synaptic efficacy.

199 In summary we find the main required steps to compute the synaptic weight updates according to  
 200 the s-FEP model (Fig. 2A). The arrival of a pre-synaptic spike at time  $t^{\text{pre}}$  leads to an ad-hoc response  
 201 by generating a postsynaptic current  $y$  according to the internal model  $q(y | w)$ . When the next bAP  
 202 arrives at the synapse a post-hoc update of the synaptic efficacy  $w$  is triggered according to Eq. (3). The

203 probabilistic model Eq. (2) does not have to be explicitly represented in the synapse but is implicit in  
204 the shape of the learning windows  $W_{\text{LTP}}(\Delta t_1, \Delta t_2)$  and  $W_{\text{LTD}}(\Delta t_1, \Delta t_2)$ . Note that the synaptic weight  
205 updates strictly follow the separation of the 'what' and 'when' information flow of event-based FEP  
206 (Fig. 1Aii).

207 The functional form of the two triplet STDP windows is determined by the neuron dynamics (Fig. 1C),  
208 and depend on  $\Delta t_1$  and  $\Delta t_2$  in a nonlinear manner [Pfister and Gerstner, 2006a]. Using Eq. (2) the  
209 STDP windows can be expressed as

$$W_{\text{LTP}}(\Delta t_1, \Delta t_2) = r_0 \frac{m(\Delta t_1, \Delta t_2)}{v(\Delta t_1, \Delta t_2)} \quad \text{and} \quad W_{\text{LTD}}(\Delta t_1, \Delta t_2) = r_0^2 \frac{1}{v(\Delta t_1, \Delta t_2)}. \quad (4)$$

210 The PSC variance ( $v$ ) has a divisive contribution to both STDP windows. Thus, the learning windows  
211 have large values where the uncertainty about  $y$  is lowest (small values for  $v$ ). In Fig. 2B-D we plot the  
212 learning windows for different values of  $\Delta t_1$  and  $\Delta t_2$ .  $W_{\text{LTP}}$  has a potentiating effect which is maximal  
213 close to  $\Delta t_1 = 0$  (Fig. 2B). This is a manifestation of Hebbian-type learning where close correlations of  
214 pre- before post- firing leads to potentiation.  $W_{\text{LTD}}$  is a depression term (Fig. 2C). Both STDP windows  
215 show also a strong rate dependence ( $\Delta t_2$ ) as higher firing rates result in less uncertainty about  $u(t)$ .  
216 Fig. 2D shows the combined effect of the LTP and LTD.

217 In Fig. 2E we study an STDP pairing protocol where single pre-/post spike pairs with different time  
218 lags  $\Delta t$  were presented to a model synapse [Pfister and Gerstner, 2006a]. The resulting synaptic changes  
219 with respect to  $\Delta t = t^{\text{post}} - t^{\text{pre}}$  closely match experimentally measured STDP windows [Dan and Poo,  
220 2004, Caporale and Dan, 2008]. In Fig. 2F we further study the rate dependence of the s-FEP learning  
221 rule. Random pre- and post-synaptic Poisson spike trains were generated with different rates. The  
222 learning rule Eq. (3) shows a strong dependence on the post-synaptic firing rate. For low pre- or post-  
223 synaptic rates synaptic efficacy changes were zero, moderate post-synaptic rates lead to LTD, whereas  
224 high post-synaptic rates manifested in pronounced LTP. This rates-weight-change relation is consistent  
225 with previous models of calcium-based plasticity [Graupner and Brunel, 2012].

226 The learning rule Eq. (3) also includes a dependence on the current synaptic efficacy to regulate  
227 the synaptic strength to not grow out of bounds (cf. [Van Rossum et al., 2000, Yger and Gilson, 2015]).  
228 The last term becomes effective when synaptic efficacies shrink to values close to zero and prevents  
229 the synaptic efficacy from becoming negative (negative weights have no meaning in our model as they  
230 also encode variances). The weight dependence of the LTD learning window increases the influence of  
231 depression for larger synaptic efficacies. In Fig. 2G we further analyze the weight dependence of the  
232 learning rule. STDP protocols for synapses with different initial synaptic efficacies were applied. Small  
233 synaptic efficacies ( $w=1$  pA) lead to learning windows that are positive for all lags  $\Delta t$  (LTP only). Large  
234 synaptic efficacies  $w=12$  pA lead to pronounced LTD.

235 In summary, the s-FEP learning rule contains features of Hebbian learning, STDP and rate-dependent  
236 synaptic plasticity to update the synaptic actions (PSC amplitudes) to better predict the somatic mem-  
237 brane dynamics. The learning rule can be best described by a post-pre-post triplet STDP rule [Pfister

238 and Gerstner, 2006a, Pfister and Gerstner, 2006b, Gjorgjieva et al., 2011]. The strength of LTD increases  
 239 with the synaptic efficacy  $w$ , which gives rise to a homeostatic effect that prevents synapses from growing  
 240 out of bounds.

### 241 2.3 Synapse-level probability matching of firing times

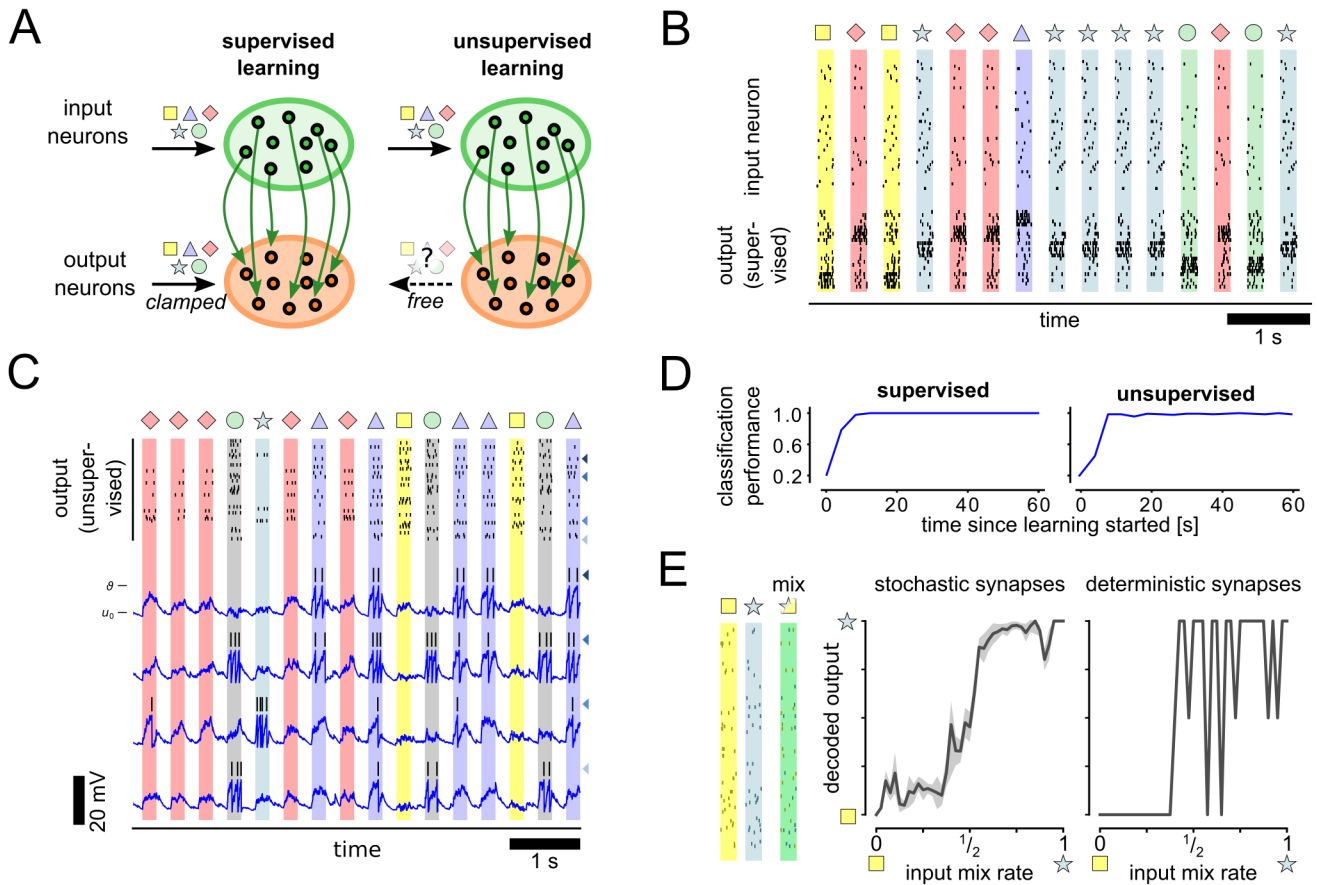

Figure 4: **s-FEP learning rule for supervised and unsupervised learning scenarios.** **A:** Illustration of the network structure with synapses shown in green being adapted by s-FEP. Five independent spike patterns ( $\square, \star, \triangle, \diamond, \circ$ ) are presented to the network via the input neurons. Output neurons are either clamped to pattern-specific activity during learning (supervised) or allowed to run freely (unsupervised). **B:** Learning result using the s-FEP rule for the supervised scenario. Typical spiking activity of the network after learning for 60 s. Black ticks show output spike times. **C:** Output activity after learning for the unsupervised scenario. Traces of membrane potentials are shown for selected output neurons (matching color-coded arrows indicate neuron identities). **D:** Classification performance for supervised and unsupervised learning scenario. Classification performance plateaus at near optimal value after about 20 s of learning time for both supervised and unsupervised scenario. **E:** Spike patterns of two input symbols ( $\square, \star$ ) where mixed with different mixing rates (example pattern shows mixing rate 1/2). Uncertainty is reflected in output decoding (left) if inputs are ambiguous (around mixing rate of 1/2). If synapse noise is disabled uncertainty is not represented in the output (right).

242 Next, we show how the learned behavior of synapses influences the firing dynamics of the post-  
243 synaptic neuron. After the synapse has formed a model of the environment, it can be used to reproduce  
244 state trajectories that match the learned behavior. For the s-FEP, this means that synapses install a  
245 particular firing pattern  $z$  through synaptic adaptation. To demonstrate this behavior, we consider here a  
246 simple example where a single postsynaptic and many pre-synaptic neurons are repeatedly brought to fire  
247 at different fixed offset times (five example pre-synaptic neurons illustrated in Fig. 3A, top). According  
248 to the stochastic bridge model, the membrane potential of the postsynaptic neuron evolves according  
249 the mean and variance functions illustrated in Fig. 3A, bottom. We forced all neurons to repeatedly fire  
250 according to the fixed pattern while the learning rule (3) was active. s-FEP learning installs behavior  
251 in the synapses that supports (or predicts) the neuron dynamics (Fig. 3B-D). Individual PSCs after  
252 learning are shown for five example synapses in Fig. 3B. The injected currents show high trial-by-trial  
253 variability and the amplitude strongly depends on the relative pre- and post-synaptic firing. Despite these  
254 variabilities, the summed effect of all PSCs show a clear increasing trend towards the postsynaptic spike  
255 (single trial shown in Fig. 3C). In this example, the optimal solutions of synaptic efficacies according to  
256 the FEP can be solved analytically. Figure 3D shows the theoretical and simulation results after learning.  
257 The synaptic efficacies learn single parameter distributions that encode the theoretically derived  $\mu^*$  and  
258  $\sigma^*$ . This is further studied in Fig. 3E, where we plot the synaptic efficacies after learning against the  
259 euclidean norm  $\|(\mu^*, \sigma^*)\| = \sqrt{(\mu^*)^2 + (\sigma^*)^2}$ . The synaptic efficacies and  $\|(\mu^*, \sigma^*)\|$  are strongly  
260 correlated (see Supplementary Text A.4 for a theoretical analysis). Fig. 3E shows the estimated mean  
261 free energy throughout learning. The free energy steadily declines with learning time.

262 Fig. 3F shows the spiking behavior after learning when the post-synaptic neuron was allowed to fire  
263 freely in response to the same input spikes that were used during learning. The firing was strongly aligned  
264 with the target activity (trial-based variance of firing times was 0.1 ms). Despite their highly stochastic  
265 nature (Fig. 3B) synapses have learned to drive the post-synaptic neuron to fire reliably. The synaptic  
266 variability can also be exploited to reflect uncertainty in neural firing. We let the postsynaptic neuron  
267 learn to fire according to Gaussian distributions of firing times with different spreads  $\sigma_{out}$  (Fig. 3G,  
268  $\sigma_{out}=5$  ms and  $\sigma_{out}=10$  ms). The variability in firing times is reflected in the neuron spiking after  
269 learning. During the phase of stochastic firing we observe a high trial-to-trial variability in the dynamics  
270 of the membrane potential (insets in Fig. 3G). Note that the pre-synaptic spike times and the LIF  
271 neuron model are deterministic here, so the required trial-by-trial variability is generated exclusively  
272 by the synapses. Hence, synapses have learned to utilize their intrinsic variability or noise to drive the  
273 deterministic neuron to fire according to a defined probability.

## 274 2.4 Network-level learning using the FEP-derived learning rule

275 The s-FEP learning rule lends itself to solve supervised and unsupervised learning scenarios on the level  
276 of neuronal networks (see Supplementary Text A.5 for a theoretical treatment). To demonstrate this  
277 we consider a pattern classification task (Fig. 4A). The network consists of input neurons that project  
278 to a set of output neurons. We generated five spike patterns of 200 ms duration (denoted in Fig. 4 by

279  $\square, \star, \triangle, \diamond$  and  $\circ$ ) which were used to control the activity of the input neurons.

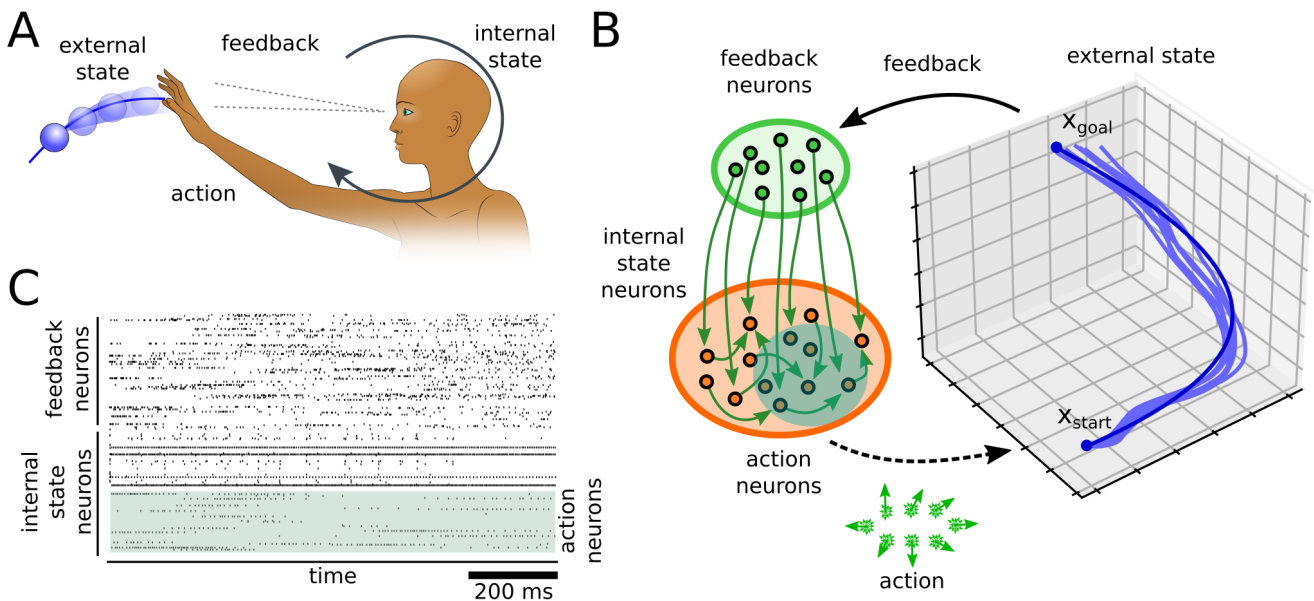

Figure 5: **The s-FEP for learning a closed-loop behavior in a recurrent network.** **A:** Illustration of the behavior level FEP for an agent that interacts with a dynamic environment. **B:** A spiking neural network interacting with an environment using s-FEP to learn a control policy. The activity of action neurons controls the movement of an agent in a 3-dimensional environment. Feedback about the position of the agent is provided through feedback neurons. The policy to navigate the agent is learned through s-FEP between feedback and action neurons. Training trajectory (dark blue) and 8 spontaneous movement trajectories generated by the network after learning (light blue) are shown. **C:** Spike train generated spontaneously by the network after learning corresponding to one movement trajectory in (B).

280 Fig. 4B shows the typical network activity after learning for the supervised scenario. The output  
 281 neurons reliably responded to their preferred pattern. The output neurons had also learned a sparse  
 282 representation of the input patterns in the unsupervised case (Fig. 4C). Most neurons (46/50) were  
 283 active during exactly one of the input patterns (e.g. the  $\triangle$ -selective neuron in the top row of Fig. 4C).  
 284 The remaining neurons showed mixed selectivity and thus got activated by multiple stimulus patterns  
 285 (see bottom rows of Fig. 4C).

286 Fig. 4D shows the evolution of the classification performance throughout learning. We used a linear  
 287 classifier on the network output to recover pattern identities. After learning for 60s the pattern identity  
 288 could be recovered by a linear classifier with 100% and 98.8% reliability for the supervised and unsu-  
 289 pervised case, respectively (see Fig. 4D). These results demonstrate that the s-FEP learning rule can be  
 290 applied to supervised learning scenarios and also leads to self-organization of meaningful representations  
 291 in an unsupervised learning scenario.

292 To demonstrate the role of noise in the pattern classification task we created ambiguous patterns  
 293 by mixing the spikes of two patterns ( $\square$  and  $\star$ ) with different mixing rates (Fig. 4E). Mixing rates  
 294 of 0 (1) corresponds to a pattern that is identical to  $\square$  ( $\star$ ). This can be encoded by a network with



295 unreliable (left, noisy synapses) and with reliable synaptic transmission (right, without noise). However,  
296 intermediate values of the mixing rate result to high levels of ambiguity that are represented in the  
297 neural output of the network with unreliable synaptic transmission, but not with noise-free synapses.

## 298 **2.5 Behavioral-level learning using the s-FEP learning in a closed-loop setup**

299 To further investigate the network effects of the s-FEP learning rule, we implemented a closed loop setup  
300 where a recurrent spiking neural network controls a behaving agent. So far we have treated the pre-  
301 synaptic firing times that trigger the synaptic PSC release as externally given, resulting in the reduced  
302 model where synapses only control post-synaptic firing. By considering a recurrent network, the synapse  
303 also indirectly gains control over pre-synaptic firing times (see Supplementary Text A.5). The behavioral  
304 setup is illustrated in Figure 5A. A fixed goal position  $x_{goal}$  has to be reached starting from  $x_{start}$  in  
305 a 3-dimensional task space. The network that was used to learn this task is shown in Fig. 5B. A set  
306 of input neurons encoded representations of the current position of the agent’s end effector, which are  
307 connected to a the recurrent network of internal state neurons. A set of action neurons were selected from  
308 the recurrent network to encode movement directions that are applied to update the agents position.  
309 All excitatory synapses in the network were trained using the s-FEP learning rule (3). During training  
310 actions are given externally to provide a supervisor signal. The training trajectory (Fig. 5B) had a  
311 duration of 1 s. 8 movement trajectories after learning for 220 seconds are shown. Fig. 5C shows  
312 corresponding network activity for a single trajectory after learning. The network has learned internal  
313 representations to reliably control the agent’s end effector in a closed loop setting.

## 314 **3 Discussion**

315 The FEP has been praised for its ability to describe biological phenomena on different spatial and  
316 temporal scales [Friston, 2010, Friston, 2012]. Here we started from the lower end of the spatial hierarchy:  
317 individual synapses that learn to interact with their postsynaptic neuron. To the best of our knowledge,  
318 this is the first time that the FEP is applied to the subcellular level to derive local learning rules,  
319 proposing a new role of pre-synaptic noise. Previous models suggest that pre-synaptic noise increases  
320 the energy and information transmission efficiency of synapses [Neftci et al., 2016, Schug et al., 2021, Levy  
321 and Baxter, 1996, Levy and Baxter, 2002, Harris et al., 2012]. We show that pre-synaptic noise can also be  
322 utilized to encode uncertainty about the somatic membrane potential, providing a theory on the role of  
323 noise on the postsynaptic side. We also demonstrate a first step investigating the functional implication  
324 of s-FEP on the network and behavioral level. This complements previous results to derive detailed  
325 properties of neural networks based on the FEP [Palacios et al., 2019, Isomura and Friston, 2020].

### 326 **3.1 Prior related work**

327 The FEP and the related theory of predictive coding have been very successful in explaining animal  
328 behavior and brain function [Rao and Ballard, 1999, Friston, 2005, Friston, 2010, Chalk et al., 2018]. On



329 the neuron and network level, previous models utilized the FEP to derive learning rules for reward-based  
330 learning and models of the dopaminergic system [Friston et al., 2014]. [Isomura et al., 2016] used the FEP  
331 to derive synaptic weight updates with third factor modulation using dopamine-like signals. A number  
332 of previous studies have approached the problem of deriving learning rules from related variational  
333 Bayesian inference theory [Deneve, 2008, Brea et al., 2013, Rezende and Gerstner, 2014, Jimenez Rezende  
334 et al., 2011, Rezende et al., 2014] and information-theoretic measures [Toyoizumi et al., 2005, Buesing  
335 and Maass, 2008, Buesing and Maass, 2010, Linsker, 1988]. In [Urbanczik and Senn, 2014] a model for  
336 dendritic prediction of somatic spiking was proposed. Different to the s-FEP approach, the uncertainty  
337 about the somatic membrane potential was not represented in these models.

338 Recently it was shown that the FEP may also provide an interesting alternative to the error back-  
339 propagation algorithm for learning in deep neural networks [Whittington and Bogacz, 2017, Millidge  
340 et al., 2020]. The s-FEP complements these results with a bottom-up approach for spiking networks. An  
341 important property of the s-FEP learning rule is that synaptic updates only depend on the timing of pre-  
342 and post-synaptic spikes, which makes the model well suited for event-based neural simulation [Pecevski  
343 et al., 2014, Peyser et al., 2017] and new brain-inspired hardware [Mayr et al., 2019, Davies et al., 2018].  
344 Therefore, s-FEP learning is a promising candidate to control unreliable signal transmission in diverse  
345 neuromorphic technologies [Indiveri et al., 2013, van De Burgt et al., 2018, Grollier et al., 2020] and even  
346 to exploit the unreliability for learning.

### 347 **3.2 Testable experimental predictions**

348 Direct experimental evidence for the FEP in cultured neurons was provided by [Isomura et al., 2015]. In  
349 [Isomura and Friston, 2018] a FEP-based encoding model was formulated and could account for observed  
350 electrophysiological responses *in vitro*. Evidence for predictive coding is also abundantly available in *in*  
351 *vivo* recordings of neural activity and brain anatomy [Bastos et al., 2012, Kanai et al., 2015, Barascud  
352 et al., 2016, Driscoll et al., 2017, Kostadinov et al., 2019]. However, the FEP has been often criticized for  
353 being too general to make any falsifiable experimental predictions [Friston et al., 2012]. In contrast, the  
354 s-FEP proposed here makes very precise predictions about the interplay of synaptic and neural dynamics.  
355 Our model directly predicts that synapses should be stochastic to effectively encode uncertainties about  
356 the somatic membrane potential. Furthermore, the s-FEP makes precise predictions about the synaptic  
357 plasticity changes in post-pre-post spike pairing protocols and the dependence on the synaptic weight  
358 (Fig. 2).

### 359 **3.3 Conclusion**

360 In summary, we have presented a synapse-centric account of the FEP that views synapses as agents  
361 that interact with their post-synaptic neuron much like an organism interacts with its environment.  
362 The emerging s-FEP learning rule matches experimentally observed synaptic mechanisms at a high level  
363 of detail. Our results complement previous applications of the FEP on the system and network level

364 and demonstrates that manifestations of the FEP can be identified even on the smallest scales of brain  
365 function. In contrast to this prior work our model synapses use only local information and yields triplet  
366 STDP dynamics which can be directly tested against experiments. The emergent learning algorithm is  
367 fully event-based, i.e. computation only takes place when pre- and post-synaptic spikes arrive at the  
368 synapses. The model is therefore very well suited for event-based neural simulation and brain-inspired  
369 hardware.

## 370 **Methods**

### 371 **Neuron model**

372 We used the leaky integrate and fire (LIF) neuron model [Gerstner et al., 2014] in all experiments, where  
373 the somatic membrane potential  $u(t)$  at time  $t > 0$  follows the dynamics

$$\tau_m \frac{du}{dt} = -(u(t) - u_0) + Ry(t), \quad (5)$$

374 where  $\tau_m$  is the membrane time constant,  $u_0$  is the resting potential and  $R$  the membrane resistance.  
375  $y(t)$  is the external input current into the neuron and denotes the effect of afferent synaptic input at  
376 time  $t$ . When the membrane potential reaches the threshold  $\vartheta$ , the neuron emits an action potential,  
377 such that the spike times  $t_f$  are defined as the time points for which the criterion

$$t_f : u(t_f) = \vartheta, \quad (6)$$

378 applies. Immediately after each spike the membrane potential is reset to the reset potential  $u_r$  [Gerstner  
379 et al., 2014]

$$\lim_{\delta \rightarrow 0} u(t_f + \delta) = u_r, \quad (7)$$

380 and we define the initial state of the neuron  $u(0) = u_r$ .

381 In Fig. 4C and Fig. 5 we used a simple threshold adaptation mechanism to control the output rate of  
382 the neurons. Individual firing thresholds  $\vartheta$  were used for every neuron. Thresholds were decreased by  
383 a value of  $10^{-5}$  mV in every millisecond and increased by  $10^{-3}$  mV after every output spike. Thresholds  
384 values were clipped from below at the resting potential  $u_0$ .

### 385 **Synapse model and Learning rule**

386 A detailed derivation of the synapse model can be found in the Supplementary Text. In Supplementary  
387 Text A.1 we summarize the main features and assumptions underlying the s-FEP. In Supplementary Text  
388 A.2 we derive the internal model  $p(u|z)$ . In Supplementary Text A.3 we define the PSC distribution  
389  $q(y|w)$ . In Supplementary Text A.4 we derive the synaptic efficacy updates (3). In Supplementary  
390 Text A.5 we develop the network-level s-FEP model.

391 We use a stochastic synapse model of input-dependent PSCs, where the variability is proportional  
 392 to the synaptic efficacy  $w$  [Yang and Xu-Friedman, 2013]. The parameter  $s_0$  of the stochastic PSC  
 393 model (1) was chosen to be the Gaussian approximation of the Binomial distribution, with  $s_0 = r_0(1 -$   
 394  $r_0)$ . On a pre-synaptic spike a current pulse with amplitude  $y$  drawn from a Gaussian distribution  
 395  $\mathcal{N}(y | r_0 w, r_0(1 - r_0) w)$ , with scaling constant  $r_0$ , is injected into the post-synaptic neuron. Otherwise  
 396 the synaptic inputs  $y(t)$  were 0.

If not stated otherwise the synaptic efficacies  $w$  were updated using the learning rule Eq. (3), where  
 $W_{LTP}(\Delta t_1, \Delta t_2)$  and  $W_{LTD}(\Delta t_1, \Delta t_2)$  are the triplet STDP windows as depicted in Fig. 2. In Supple-  
 mentary Text A.4 we show in detail that the synaptic efficacy updates (3) minimize the free energy  
 $\mathcal{F}(z, w)$  of the back-propagating action potentials  $z$  with respect to the synaptic efficacy  $w$ . We further  
 show that the triplet STDP windows can be defined analytically using the stochastic bridge model with  
 time varying mean and variance functions  $\mu(\Delta t_1, \Delta t_2)$  and  $\sigma^2(\Delta t_1, \Delta t_2)$ , respectively

$$\mu(\Delta t_1, \Delta t_2) = u_0 + (u_r - u_0) \frac{e^{\frac{\Delta t_1}{\tau_m}} - e^{-\frac{\Delta t_1}{\tau_m}}}{e^{\frac{\Delta t_2}{\tau_m}} - e^{-\frac{\Delta t_2}{\tau_m}}} + (\vartheta - u_0) \frac{e^{\frac{\Delta t_2 - \Delta t_1}{\tau_m}} - e^{\frac{\Delta t_1 - \Delta t_2}{\tau_m}}}{e^{\frac{\Delta t_2}{\tau_m}} - e^{-\frac{\Delta t_2}{\tau_m}}}, \quad (8)$$

397 and

$$\sigma^2(\Delta t_1, \Delta t_2) = \sigma_0^2 \frac{1}{1 + \gamma \left( e^{\frac{\Delta t_1 - \Delta t_2}{\tau_m}} + e^{-\frac{\Delta t_1}{\tau_m}} \right)}, \quad (9)$$

398 (see Supplementary Text A.2 for a derivation), where  $\sigma_0$  and  $\gamma$  are synaptic constants that scales the  
 399 noise contribution to  $u$ .

400 The posterior PSC distribution  $m(\Delta t_1, \Delta t_2)$  and  $v(\Delta t_1, \Delta t_2)$  in Eq. (2) were computed for the LIF  
 401 neuron model (Section 3.3), given by

$$\begin{aligned} m(\Delta t_1, \Delta t_2) &= \mu'(\Delta t_1, \Delta t_2) + \frac{1}{\tau_m} (\mu(\Delta t_1, \Delta t_2) - u_0), \\ v(\Delta t_1, \Delta t_2) &= \left( \sigma^2(\Delta t_1, \Delta t_2) \right)' + \frac{2}{\tau_m} \sigma^2(\Delta t_1, \Delta t_2), \end{aligned} \quad (10)$$

402 where  $f'(t) = \frac{d}{dt} f(t)$  denotes the time derivative (see Supplementary Text A.3 for a detailed derivation).

## 403 Numerical simulations

404 All simulations were performed in Python (3.8.5) using the Euler method to approximate the solution  
 405 of the stochastic differential equations with a fixed time step of 1 ms. Post-Synaptic currents were  
 406 created as described in (A.13) where Dirac delta pulses were approximated by 1 ms rectangular pulses  
 407 and truncated at zero to avoid negative currents. If not stated otherwise we used a synaptic release  
 408 parameter  $r_0 = \frac{1}{2}$ . In Eq. (5) the membrane time constant  $\tau_m$  was 30 ms, the resting potential  $u_0$  was  
 409 -70 mV and the membrane resistance  $R$  was 10 M $\Omega$ . The firing threshold  $\vartheta$  was -55 mV,  $u_r$  was -75 mV  
 410 and the learning rate  $\eta$  was  $10^{-5}$ . In Eq. (9) we used  $\sigma_0^2 = 16$  and  $\gamma = 50$ . Weights were drawn randomly

411 and independently from a Gaussian distribution with mean and standard deviation of 10 and clipped at  
412 0 before learning.

413 In Fig. 2 we used a single s-FEP synapses, applied different pre/post spike pairing protocols and  
414 recorded the resulting weight changes. In Fig. 2D STDP spike protocols were repeated 50 times with a  
415 time delay of 500 ms between two pairings. In Fig. 2E independent Poisson spike trains were presented  
416 to the synapses for 100s. Fig. 2F the STDP protocol from Fig. 2D was repeated with different initial  
417 weights.

418 In Fig. 3 we used single neurons that received input from 300 afferent input neurons. Input neurons  
419 fired a dense syn-fire chain where every neuron was emitting a spike in exactly 1 ms during a 300 ms time  
420 window. The post-synaptic neuron was brought to fire at the end of this pattern. In Fig. 3F and G the  
421 output firing was determined by the intrinsic neuron dynamics after learning. In Fig. 3G output spike  
422 times were drawn from a Gaussian distribution with different standard deviations during learning.

423 In Fig. 4 spike patterns were generated by randomly drawing values from a beta distribution ( $\alpha = 0.2$ ,  
424  $\beta = 0.8$ ) for each input channel and multiplying these values with the maximum rate of 20 Hz. From  
425 these rate patterns individual Poisson spike trains were drawn for every pattern. During the learning  
426 phase the output neurons were clamped to fire 50 Hz Poisson spike trains during presentation of the  
427 preferred stimulus pattern and remain silent otherwise. Pattern presentations were interleaved with  
428 phases of 200 ms of zero spiking on all input channels. In the supervised scenario, for every output  
429 neuron one of the five patterns was selected as preferred stimulus. During training the activity of the  
430 output neurons was clamped to fire during the presentation of the preferred stimulus pattern.

431 In the unsupervised scenario, the network was augmented with fixed lateral inhibition to stabilize  
432 the firing behavior during learning. All excitatory neurons were connected to the inhibitory neuron with  
433 a synaptic efficacy of 1. The inhibitory unit projected back to all excitatory neurons with a synaptic  
434 efficacy of -5. During learning output neurons were allowed to run freely according to their intrinsic  
435 dynamics. The s-FEP learning rule was used at all synapses between input and output neurons in both  
436 scenarios. In Fig. 4E we set the synaptic release parameter  $r_0$  to 1 to disable synaptic noise (*'without*  
437 *noise'* condition).

438 In Fig. 5 we used a recurrent network with 400 feedback neurons and 400 internal state neurons  
439 from which we selected 200 action neurons. Preferred positions of the feedback neurons were scattered  
440 uniformly over the action space and firing rates were scaled by the euclidean distance between agent po-  
441 sition and preferred position. Action neurons were randomly assigned to preferred movement directions.  
442 Internal state neurons received lateral inhibitory feedback and rate adaptation as in Fig. 4. During  
443 spontaneous movement the agent's end effector was set to  $x_{start}$  at trial onset, and then the position was  
444 updated every 50 ms by adding the decoded position offset provided by the action neurons (light blue  
445 traces in Fig. 5). During training the activity of action neurons was clamped to a pre-defined training  
446 trajectory (dark blue in Fig. 5).

## 447 **Acknowledgements**

448 Written under partial support by the European Commission, Horizon 2020 Framework Programme for  
449 Research and Innovation, Grant Agreement No. 899265 (ADOPD). The authors would like to thank  
450 Anand Subramoney for valuable comments to the manuscript.

## 451 **Author contribution and correspondence**

452 DK derived the theory and conducted the experiments. DK and CT conceived the model and experi-  
453 ments. DK and CT wrote the paper. To whom correspondence should be addressed: david.kappel@uni-  
454 goettingen.de

## 455 **Competing interests**

456 The authors declare no competing interests.

## 457 **References**

- 458 Aitchison et al., 2021. Aitchison, L., Jegminat, J., Menendez, J. A., Pfister, J.-P., Pouget, A., and  
459 Latham, P. E. (2021). Synaptic plasticity as bayesian inference. *Nature Neuroscience*, 24(4):565–  
460 571.
- 461 Aitchison et al., 2014. Aitchison, L., Pouget, A., and Latham, P. E. (2014). Probabilistic synapses.  
462 arXiv preprint arXiv:1410.1029.
- 463 Barascud et al., 2016. Barascud, N., Pearce, M. T., Griffiths, T. D., Friston, K. J., and Chait, M.  
464 (2016). Brain responses in humans reveal ideal observer-like sensitivity to complex acoustic patterns.  
465 *Proceedings of the National Academy of Sciences*, 113(5):E616–E625.
- 466 Bastos et al., 2012. Bastos, A. M., Usrey, W. M., Adams, R. A., Mangun, G. R., Fries, P., and Friston,  
467 K. J. (2012). Canonical microcircuits for predictive coding. *Neuron*, 76(4):695–711.
- 468 Borst, 2010. Borst, J. G. G. (2010). The low synaptic release probability in vivo. *Trends in neuro-*  
469 *sciences*, 33(6):259–266.
- 470 Brea et al., 2013. Brea, J., Senn, W., and Pfister, J.-P. (2013). Matching recall and storage in sequence  
471 learning with spiking neural networks. *The Journal of Neuroscience*, 33(23):9565–9575.
- 472 Buckley et al., 2017. Buckley, C. L., Kim, C. S., McGregor, S., and Seth, A. K. (2017). The free energy  
473 principle for action and perception: A mathematical review. *Journal of Mathematical Psychology*,  
474 81:55–79.

- 475 Buesing and Maass, 2008. Buesing, L. and Maass, W. (2008). Simplified rules and theoretical anal-  
476 ysis for information bottleneck optimization and pca with spiking neurons. In *Advances in Neural*  
477 *Information Processing Systems*, pages 193–200.
- 478 Buesing and Maass, 2010. Buesing, L. and Maass, W. (2010). A spiking neuron as information bot-  
479 tleneck. *Neural computation*, 22(8):1961–1992.
- 480 Caporale and Dan, 2008. Caporale, N. and Dan, Y. (2008). Spike timing-dependent plasticity: a  
481 hebbian learning rule. *Annu. Rev. Neurosci.*, 31:25–46.
- 482 Chalk et al., 2018. Chalk, M., Marre, O., and Tkačik, G. (2018). Toward a unified theory of efficient,  
483 predictive, and sparse coding. *Proceedings of the National Academy of Sciences*, 115(1):186–191.
- 484 Corlay, 2013. Corlay, S. (2013). Properties of the ornstein-uhlenbeck bridge. arXiv preprint  
485 arXiv:1310.5617.
- 486 Cornejo et al., 2021. Cornejo, V. H., Ofer, N., and Yuste, R. (2021). Voltage compartmentalization  
487 in dendritic spines in vivo. *Science*, page eabg0501.
- 488 Dan and Poo, 2004. Dan, Y. and Poo, M.-m. (2004). Spike timing-dependent plasticity of neural  
489 circuits. *Neuron*, 44(1):23–30.
- 490 Davies et al., 2018. Davies, M., Srinivasa, N., Lin, T.-H., Chinya, G., Cao, Y., Choday, S. H., Dimou,  
491 G., Joshi, P., Imam, N., Jain, S., et al. (2018). Loihi: A neuromorphic manycore processor with  
492 on-chip learning. *Ieee Micro*, 38(1):82–99.
- 493 Deneve, 2008. Deneve, S. (2008). Bayesian spiking neurons ii: learning. *Neural computation*,  
494 20(1):118–145.
- 495 Driscoll et al., 2017. Driscoll, L. N., Pettit, N. L., Minderer, M., Chettih, S. N., and Harvey, C. D.  
496 (2017). Dynamic reorganization of neuronal activity patterns in parietal cortex. *Cell*, 170(5):986–999.
- 497 Friston, 2005. Friston, K. (2005). A theory of cortical responses. *Philosophical transactions of the*  
498 *Royal Society B: Biological sciences*, 360(1456):815–836.
- 499 Friston, 2008. Friston, K. (2008). Variational filtering. *NeuroImage*, 41(3):747–766.
- 500 Friston, 2010. Friston, K. (2010). The free-energy principle: a unified brain theory? *Nature reviews*  
501 *neuroscience*, 11(2):127.
- 502 Friston, 2012. Friston, K. (2012). A free energy principle for biological systems. *Entropy*, 14(11):2100–  
503 2121.
- 504 Friston et al., 2014. Friston, K., Schwartenbeck, P., FitzGerald, T., Moutoussis, M., Behrens, T.,  
505 and Dolan, R. J. (2014). The anatomy of choice: dopamine and decision-making. *Philosophical*  
506 *Transactions of the Royal Society B: Biological Sciences*, 369(1655):20130481.



- 507 Friston et al., 2012. Friston, K., Thornton, C., and Clark, A. (2012). Free-energy minimization and  
508 the dark-room problem. *Frontiers in psychology*, 3:130.
- 509 Gerstner et al., 2014. Gerstner, W., Kistler, W. M., Naud, R., and Paninski, L. (2014). *Neuronal*  
510 *dynamics: From single neurons to networks and models of cognition*. Cambridge University Press.
- 511 Gjorgjieva et al., 2011. Gjorgjieva, J., Clopath, C., Audet, J., and Pfister, J.-P. (2011). A triplet spike-  
512 timing-dependent plasticity model generalizes the bienenstock-cooper-munro rule to higher-order  
513 spatiotemporal correlations. *Proceedings of the National Academy of Sciences*, 108(48):19383–19388.
- 514 Gontier and Pfister, 2020. Gontier, C. and Pfister, J.-P. (2020). Identifiability of a binomial synapse.  
515 *Frontiers in computational neuroscience*, 14:86.
- 516 Graupner and Brunel, 2012. Graupner, M. and Brunel, N. (2012). Calcium-based plasticity model  
517 explains sensitivity of synaptic changes to spike pattern, rate, and dendritic location. *Proceedings of*  
518 *the National Academy of Sciences*, 109(10):3991–3996.
- 519 Grollier et al., 2020. Grollier, J., Querlioz, D., Camsari, K., Everschor-Sitte, K., Fukami, S., and  
520 Stiles, M. D. (2020). Neuromorphic spintronics. *Nature electronics*, 3(7):360–370.
- 521 Harris et al., 2012. Harris, J. J., Jolivet, R., and Attwell, D. (2012). Synaptic energy use and supply.  
522 *Neuron*, 75(5):762–777.
- 523 Indiveri et al., 2013. Indiveri, G., Linares-Barranco, B., Legenstein, R., Deligeorgis, G., and Prodromakis, T. (2013). Integration of nanoscale memristor synapses in neuromorphic computing architectures. *Nanotechnology*, 24(38):384010.
- 526 Isomura and Friston, 2018. Isomura, T. and Friston, K. (2018). In vitro neural networks minimise  
527 variational free energy. *Scientific reports*, 8(1):16926.
- 528 Isomura and Friston, 2020. Isomura, T. and Friston, K. (2020). Reverse-engineering neural networks  
529 to characterize their cost functions. *Neural Computation*, 32(11):2085–2121.
- 530 Isomura et al., 2015. Isomura, T., Kotani, K., and Jimbo, Y. (2015). Cultured cortical neurons can  
531 perform blind source separation according to the free-energy principle. *PLoS computational biology*,  
532 11(12):e1004643.
- 533 Isomura et al., 2016. Isomura, T., Sakai, K., Kotani, K., and Jimbo, Y. (2016). Linking neuro-  
534 modulated spike-timing dependent plasticity with the free-energy principle. *Neural computation*,  
535 28(9):1859–1888.
- 536 Jensen et al., 2019. Jensen, T. P., Zheng, K., Cole, N., Marvin, J. S., Looger, L. L., and Rusakov,  
537 D. A. (2019). Multiplex imaging relates quantal glutamate release to presynaptic  $Ca^{2+}$  homeostasis  
538 at multiple synapses in situ. *Nature communications*, 10(1):1–14.

- 539 Jimenez Rezende et al., 2011. Jimenez Rezende, D., Wierstra, D., and Gerstner, W. (2011). Varia-  
540 tional learning for recurrent spiking networks. In *Neural Information Processing Systems*.
- 541 Kanai et al., 2015. Kanai, R., Komura, Y., Shipp, S., and Friston, K. (2015). Cerebral hierarchies:  
542 predictive processing, precision and the pulvinar. *Philosophical Transactions of the Royal Society*  
543 *B: Biological Sciences*, 370(1668):20140169.
- 544 Katz, 1971. Katz, B. (1971). Quantal mechanism of neural transmitter release. *Science*,  
545 173(3992):123–126.
- 546 Kiebel and Friston, 2011. Kiebel, S. J. and Friston, K. J. (2011). Free energy and dendritic self-  
547 organization. *Frontiers in systems neuroscience*, 5:80.
- 548 Kingma and Welling, 2013. Kingma, D. P. and Welling, M. (2013). Auto-encoding variational bayes.  
549 arXiv preprint arXiv:1312.6114.
- 550 Kostadinov et al., 2019. Kostadinov, D., Beau, M., Pozo, M. B., and Häusser, M. (2019). Predictive  
551 and reactive reward signals conveyed by climbing fiber inputs to cerebellar purkinje cells. *Nature*  
552 *Neuroscience*, 22(6):950–962.
- 553 Levy and Baxter, 1996. Levy, W. B. and Baxter, R. A. (1996). Energy efficient neural codes. *Neural*  
554 *computation*, 8(3):531–543.
- 555 Levy and Baxter, 2002. Levy, W. B. and Baxter, R. A. (2002). Energy-efficient neuronal computation  
556 via quantal synaptic failures. *Journal of Neuroscience*, 22(11):4746–4755.
- 557 Linsker, 1988. Linsker, R. (1988). Self-organization in a perceptual network. *Computer*, 21(3):105–  
558 117.
- 559 Maass, 2014. Maass, W. (2014). Noise as a resource for computation and learning in networks of  
560 spiking neurons. *Proceedings of the IEEE*, 102(5):860–880.
- 561 Mayr et al., 2019. Mayr, C., Hoepfner, S., and Furber, S. (2019). Spinnaker 2: A 10 million core  
562 processor system for brain simulation and machine learning. arXiv preprint arXiv:1911.02385.
- 563 Meyer et al., 2001. Meyer, A. C., Neher, E., and Schneggenburger, R. (2001). Estimation of quantal  
564 size and number of functional active zones at the calyx of held synapse by nonstationary epsc variance  
565 analysis. *Journal of Neuroscience*, 21(20):7889–7900.
- 566 Millidge et al., 2020. Millidge, B., Tschantz, A., and Buckley, C. L. (2020). Predictive coding approx-  
567 imates backprop along arbitrary computation graphs. arXiv preprint arXiv:2006.04182.
- 568 Mnih and Gregor, 2014. Mnih, A. and Gregor, K. (2014). Neural variational inference and learning  
569 in belief networks. arXiv preprint arXiv:1402.0030.

- 570 Neal and Hinton, 1998. Neal, R. and Hinton, G. (1998). A view of the em algorithm that justifies  
571 incremental sparse, and other variants. *Learning in Graphical Models*, pages 355–368.
- 572 Neftci et al., 2016. Neftci, E. O., Pedroni, B. U., Joshi, S., Al-Shedivat, M., and Cauwenberghs, G.  
573 (2016). Stochastic synapses enable efficient brain-inspired learning machines. *Frontiers in neuro-*  
574 *science*, 10:241.
- 575 Oertner et al., 2002. Oertner, T. G., Sabatini, B. L., Nimchinsky, E. A., and Svoboda, K. (2002).  
576 Facilitation at single synapses probed with optical quantal analysis. *Nature neuroscience*, 5(7):657–  
577 664.
- 578 Palacios et al., 2019. Palacios, E. R., Isomura, T., Parr, T., and Friston, K. (2019). The emergence  
579 of synchrony in networks of mutually inferring neurons. *Scientific reports*, 9(1):1–14.
- 580 Pecevski et al., 2014. Pecevski, D., Kappel, D., and Jonke, Z. (2014). NEVESIM: Event-driven neural  
581 simulation framework with a python interface. *Frontiers in Neuroinformatics*, 8:70.
- 582 Peyser et al., 2017. Peyser, A., Deepu, R., Mitchell, J., Appukuttan, S., Schumann, T., Eppler, J. M.,  
583 Kappel, D., Hahne, J., Zajzon, B., Kitayama, I., et al. (2017). Nest 2.14. 0. Technical report, Jülich  
584 Supercomputing Center.
- 585 Pfister and Gerstner, 2006a. Pfister, J.-P. and Gerstner, W. (2006a). Beyond pair-based stdp: A  
586 phenomenological rule for spike triplet and frequency effects. In *Advances in neural information*  
587 *processing systems*, pages 1081–1088.
- 588 Pfister and Gerstner, 2006b. Pfister, J.-P. and Gerstner, W. (2006b). Triplets of spikes in a model of  
589 spike timing-dependent plasticity. *Journal of Neuroscience*, 26(38):9673–9682.
- 590 Pulido and Ryan, 2020. Pulido, C. and Ryan, T. A. (2020). Synaptic vesicle pools are a major hidden  
591 resting metabolic burden of nerve terminals. *bioRxiv*.
- 592 Ramstead et al., 2016. Ramstead, M. J., Veissière, S. P., and Kirmayer, L. J. (2016). Cultural affor-  
593 dances: Scaffolding local worlds through shared intentionality and regimes of attention. *Frontiers*  
594 *in psychology*, 7:1090.
- 595 Ramstead et al., 2018. Ramstead, M. J. D., Badcock, P. B., and Friston, K. J. (2018). Answering  
596 schrödinger’s question: A free-energy formulation. *Physics of life reviews*, 24:1–16.
- 597 Rao and Ballard, 1999. Rao, R. P. and Ballard, D. H. (1999). Predictive coding in the visual cortex: a  
598 functional interpretation of some extra-classical receptive-field effects. *Nature neuroscience*, 2(1):79.
- 599 Rezende and Gerstner, 2014. Rezende, D. J. and Gerstner, W. (2014). Stochastic variational learning  
600 in recurrent spiking networks. *Frontiers in Computational Neuroscience*, 8(38):1–14.

- 601 Rezende et al., 2014. Rezende, D. J., Mohamed, S., and Wierstra, D. (2014). Stochastic backpropaga-  
602 tion and approximate inference in deep generative models. In *International conference on machine*  
603 *learning*, pages 1278–1286. PMLR.
- 604 Rusakov et al., 2020. Rusakov, D. A., Savtchenko, L. P., and Latham, P. E. (2020). Noisy synaptic  
605 conductance: bug or a feature? *Trends in Neurosciences*, 43(6):363–372.
- 606 Schug et al., 2021. Schug, S., Benzing, F., and Steger, A. (2021). Presynaptic stochasticity improves  
607 energy efficiency and helps alleviate the stability-plasticity dilemma. *Elife*, 10:e69884.
- 608 Szavits-Nossan and Evans, 2015. Szavits-Nossan, J. and Evans, M. R. (2015). Inequivalence of  
609 nonequilibrium path ensembles: the example of stochastic bridges. *Journal of Statistical Mechanics:*  
610 *Theory and Experiment*, 2015(12):P12008.
- 611 Toyozumi et al., 2005. Toyozumi, T., Pfister, J.-P., Aihara, K., and Gerstner, W. (2005). General-  
612 ized bienenstock–cooper–munro rule for spiking neurons that maximizes information transmission.  
613 *Proceedings of the National Academy of Sciences*, 102(14):5239–5244.
- 614 Urbanczik and Senn, 2014. Urbanczik, R. and Senn, W. (2014). Learning by the dendritic prediction  
615 of somatic spiking. *Neuron*, 81(3):521–528.
- 616 van De Burgt et al., 2018. van De Burgt, Y., Melianas, A., Keene, S. T., Malliaras, G., and Salleo,  
617 A. (2018). Organic electronics for neuromorphic computing. *Nature Electronics*, 1(7):386–397.
- 618 Van Rossum et al., 2000. Van Rossum, M. C., Bi, G. Q., and Turrigiano, G. G. (2000). Stable hebbian  
619 learning from spike timing-dependent plasticity. *The Journal of Neuroscience*, 20(23):8812–8821.
- 620 Whittington and Bogacz, 2017. Whittington, J. C. and Bogacz, R. (2017). An approximation of the  
621 error backpropagation algorithm in a predictive coding network with local hebbian synaptic plastic-  
622 ity. *Neural computation*, 29(5):1229–1262.
- 623 Yang and Xu-Friedman, 2013. Yang, H. and Xu-Friedman, M. A. (2013). Stochastic properties of neu-  
624 rotransmitter release expand the dynamic range of synapses. *Journal of Neuroscience*, 33(36):14406–  
625 14416.
- 626 Yger and Gilson, 2015. Yger, P. and Gilson, M. (2015). Models of metaplasticity: a review of concepts.  
627 *Frontiers in computational neuroscience*, 9:138.

## 628 A Supplementary information

629 In this Supplementary Text we provide the details to the derivation and implementation of the s-FEP  
630 model. This document is organized as follows: In Supplementary Text A.1 we review the main idea  
631 behind the FEP and how it is utilized here on the level of single synapses. In Supplementary Text  
632 A.2 we define the *generative density* that is used by the synapse to estimate the state of the somatic  
633 membrane potential. In Supplementary Text A.3 we define the *recognition density* that determines the  
634 dynamics of the stochastic synapse model. In Supplementary Text A.4 we develop our main theoretical  
635 result to show that the synaptic efficacy updates (3) of the main text, minimize the free energy  $\mathcal{F}(z, w)$   
636 of the synaptic efficacy  $w$  with respect to the back-propagating action potentials  $z$ . In Supplementary  
637 Text A.5 we show that the same learning rules also emerge if the s-FEP is applied to a learning scenario  
638 for recurrent neural networks with arbitrary numbers of neurons and synapses.

### 639 A.1 Synapse-level free energy minimization

640 Here we provide a brief overview over the main aspects of the FEP that are needed for our treatment  
641 of single synapses. Since we focus here on a relatively simple physical system – individual synapses that  
642 interacts with their post-synaptic neuron – we only need a subset of the theoretical framework that is  
643 provided by the FEP. An excellent comprehensive review on this topic can be found in [Buckley et al.,  
644 2017].

645 The FEP is a generic theoretical framework to describe the interaction of a behaving agent with its  
646 environment. Its main assumption is that the agent and the environment have physically separated states,  
647 the *internal* ( $w$ ) and *external* ( $u$ ) states, respectively, that cannot directly influence another. Interaction  
648 only takes place through specific *actions* ( $y$ ), performed by the agent and *feedback* ( $z$ ) provided by the  
649 environment. The FEP suggests that the agent should adapt its behavior to minimize the surprise caused  
650 by the feedback  $z$ , measured by the negative log likelihood,  $\text{surprise}(z) = -\log p(z)$ .

651 The FEP proposes a specific method to approaching a state of minimum surprise. This method rests  
652 on the idea that a biological organism maintains an internal model of its environment, that allows it to  
653 reason about the external states  $u$ . The internal model is composed of two parts, (1) the *recognition*  
654 *density*  $q(u | w)$ , that describes how the external state  $u$  interacts with the internal state  $w$ , and (2)  
655 the *generative density*  $p(u, z)$ , that describes the dependency between external states  $u$  and feedback  
656  $z$  [Buckley et al., 2017]. To simplify the notation we employ here the commonly used shortcut  $q_w(u)$   
657 for  $q(u | w)$ . The recognition density is parameterized by the internal state  $w$ . The generative density  
658 depends here on the set of somatic parameters that comprise the firing threshold  $\vartheta$ , reset- and resting  
659 potential,  $u_r$  and  $u_0$ , and the membrane time constant  $\tau_m$ . We assume that these parameters are constant  
660 and encoded *a-priori* into the dynamics of the synapses such that the dynamics of the soma and the  
661 synapse match (e.g. through evolutionary processes or adaptation that is significantly slower than the  
662 learning dynamics). Plasticity mechanisms to fine-tune the synaptic behavior to track changes in somatic  
663 parameters could be derived from the s-FEP framework as well, but are not the focus of this study.

664 Using this internal model the complexity of the surprise minimization problem can be approached  
 665 by replacing the goal to minimize surprise directly by a variational upper bound, that allows us to split  
 666 the problem into two parts. The theory stems from the observation that an upper bound on the surprise  
 667 can be reached indirectly by employing the recognition density  $q$  to *guess* external states  $u$ , and the  
 668 generative density  $p$  evaluates how well the feedback  $z$  agrees with the guessed external states  $u$ . The  
 669 problem to minimize surprise is then augmented with a divergence term to also minimizing the mismatch  
 670 between  $q$  and  $p$ .

671 We adopted this idea and suggested to minimize an upper bound on the surprise in every synapse,  
 672 given by the variational free energy  $\mathcal{F}$ , which is defined as

$$\mathcal{F}(z, w) = \text{surprise}(z) + \text{divergence}(q|p) = -\log p(z) + \mathcal{D}_{\text{KL}}(q \| p) \geq \text{surprise}(z), \quad (\text{A.1})$$

where  $\mathcal{D}_{\text{KL}}(q \| p)$  is the Kullback-Leibler (KL)-divergence between  $q_w(u)$  and  $p(u|z)$ . The inequality in (A.1) follows from  $\mathcal{D}_{\text{KL}}(q \| p) \geq 0$  for any two probability distributions  $q$  and  $p$ . Inserting the definition of the KL-divergence we get

$$\mathcal{F}(z, w) = -\log p(z) + \mathcal{D}_{\text{KL}}(q \| p) \quad (\text{A.2})$$

$$= -\log p(z) + \left\langle \log \frac{q_w(u)}{p(u|z)} \right\rangle_{q_w(u)} = \left\langle \log \frac{q_w(u)}{p(u, z)} \right\rangle_{q_w(u)}, \quad (\text{A.3})$$

673 where  $\langle f(u) \rangle_{q_w(u)}$  denotes the expectation of some function  $f(u)$  with respect to the probability density  
 674  $q_w(u)$ . By rearranging the terms of this last form, we can establish a link to the Helmholtz free energy  
 675 that measures the useful energy potential in closed thermodynamic systems, from which the FEP inherits  
 676 its name [Buckley et al., 2017, Neal and Hinton, 1998], by interpreting  $\epsilon(u, z) = -\log p(u, z)$  as the energy  
 677 of state  $(u, z)$ , to get

$$\underbrace{\mathcal{F}(z, w)}_{\text{Variational free energy}} = \underbrace{\left\langle \epsilon(u, z) \right\rangle_{q_w(u)}}_{\text{Expected internal energy with respect to } q_w} - \underbrace{H(q_w)}_{\text{Entropy of } q_w}. \quad (\text{A.4})$$

678 Using these definitions, we identify the relevant variables in our synapse model that are required  
 679 by the FEP: (1.) *the internal states*, (2.) *the actions*, (3.) *the external states*, and (4.) *the feedback*  
 680 (see [Friston, 2008] and Fig. 1 for an illustration).

681 1. *The internal states* summarizes all relevant internal variables that determine the behavior of the  
 682 synapse. Since we focus here on long-term synaptic plasticity the internal state is given by the  
 683 synaptic efficacy  $w$ . The internal states can be augmented with additional variables to also include  
 684 other mechanisms, e.g. short term plasticity, but we neglect these here for the sake of simplicity.

685 2. *The actions* are utilized by the synapses to interact with the environment (the efferent neuron).  
 686 In our model this is done through stochastic synaptic currents  $y$ , where the mean and variance of



687  $y$  is governed by the synaptic efficacy  $w$ . In our model,  $y$  denotes a sequence of synaptic currents  
 688  $y = (y(t) | t \geq 0)$ .

689 3. *The external states.* From the perspective of a synapse, the environment, it can immediately  
 690 interact with, is the post-synaptic neuron. Here, we model the external states as the somatic  
 691 membrane potential  $u(t)$  of a leaky integrate and fire (LIF) neuron with firing threshold  $\vartheta$  and  
 692 resting potential  $u_0$ . We denote the whole sequence of the somatic membrane potential by  $u =$   
 693  $(u(t) | t \geq 0)$ .

694 4. *The feedback.* In our model, a synapse only receives the back-propagating action potential of  
 695 the post-synaptic neuron  $z$  as feedback to be informed about the somatic membrane potential.  
 696 Formally, the spike train  $z$  is denoted by the set of firing times  $t_n^{\text{post}}, t_{n+1}^{\text{post}}, \dots$  of the post-synaptic  
 697 neuron. This feedback information about the external state  $u(t)$  is used by the synapse to update  
 698 the internal model of the environment  $p(u, z)$ .

Learning is realized in the FEP by minimizing  $\mathcal{F}(z, w)$  with respect to  $w$ , which can be done by  
 gradient decent

$$\Delta w = -\frac{\partial}{\partial w} \mathcal{F}(z, w), \quad (\text{A.5})$$

699 In the following sections we will derive the learning rule that solves this optimization problem for the  
 700 case of our synapse model step by step. We consider the general form of the weight changes  $\Delta w$  to  
 701 show that the learning problem (A.5) can be solved by applying weight updates that only depend on  
 702 the pre- and post-synaptic firing times, the current value of the synaptic efficacy and constants that are  
 703 independent of learning, given by

$$\Delta w = W_3(\Delta t_1, \Delta t_2, w) = W_{\text{LTP}}(\Delta t_1, \Delta t_2) - \left( \frac{1-r_0}{2r_0} + w \right) W_{\text{LTD}}(\Delta t_1, \Delta t_2) + \frac{1}{2w}, \quad (\text{A.6})$$

704 with  $\Delta t_1 = t_2^{\text{post}} - t^{\text{pre}}$  and  $\Delta t_2 = t_2^{\text{post}} - t_1^{\text{post}}$ . (A.6) is the general case for an arbitrary synaptic parameter  
 705  $r_0$ . Eq. (3) shows the special case for  $r_0 = \frac{1}{2}$  which was used throughout the paper (except Fig.4E). In  
 706 our simulations we performed synaptic efficacy updates  $w_{\text{new}} = w_{\text{old}} + \eta \Delta w$  for every post-pre-post spike  
 707 triplet, with  $t_1^{\text{post}} < t^{\text{pre}} < t_2^{\text{post}}$ , where  $t_1^{\text{post}}$  and  $t_2^{\text{post}}$  are the spike times of two neighboring post-synaptic  
 708 spikes, and  $t^{\text{pre}}$  is a pre-synaptic spike time.  $\eta$  is a small positive constant learning rate  $\eta = 10^{-5}$ . Weight  
 709 updates were applied immediately at the arrival of the bAP events  $t_2^{\text{post}}$  (no batching or buffering).

## 710 A.2 The generative density

711 In this section we formally define the generative density  $p(u, z)$  which describes the joint dynamics of the  
 712 membrane potential  $u$ , and the observed post-synaptic spike train  $z$  back-propagating to the synapse, in  
 713 Eq. A.3. To arrive at this result it is convenient to think of the somatic membrane dynamics in terms of  
 714 a deterministic function  $g$ , with  $u(t) = g(y, t)$ , that maps a given sequence of synaptic input currents,

715  $y$ , to the current value of the membrane potential at time  $t$ .  $g$  is a piece-wise continuous function that  
 716 obeys the membrane dynamics (5)-(7). The probability density of a membrane potential trace  $u$ , then  
 717 reduces to a point density where  $u$  equals  $g$  at all times, i.e.

$$p(u | y) = \delta \left( \int_0^\infty |u(t) - g(y, t)| dt \right) \quad (\text{A.7})$$

718 where  $\delta$  is the Dirac delta function. We will further use the notation  $u = g(y)$  to denote the sequence of  
 719 membrane potential values  $u(t) = g(y, t)$ , for a given  $y$ .

720 Equation (A.7) can be used to assign a membrane potential trace  $u$  to a sequence of PSCs  $y$  with  
 721 absolute certainty. However, a synapse does not have access to the true value of  $y$  (or  $u$ ) since it may  
 722 include input from other synapses that cannot be directly observed (and possibly further unobserved  
 723 processes other than synaptic input). To reflect this uncertainty about  $u$  we assume for the definition of  
 724 the generative density, that  $y$  is given by a stochastic process. Using this we can rewrite the dynamics  
 725 of the membrane potential  $u(t)$ , (5) in terms of a stochastic differential equation, by replacing the input  
 726 current  $y(t)$ , to get

$$du = \frac{1}{\tau_m}(u_0 - u(t)) dt + \sigma_0 d\mathcal{W}(t), \quad (\text{A.8})$$

727 with resting membrane potential  $u_0$  and where  $\sigma_0$  scales the contribution of the total stochastic input  
 728 and  $d\mathcal{W}(t)$  are the increments of the Wiener process.

729 (A.8) is an Ornstein-Uhlenbeck (OU)-process that describes the dynamics of the LIF neuron model  
 730 with stochastic inputs [Gerstner et al., 2014]. This model is convenient because it compactly captures  
 731 the uncertainty of a synapse that is not able to directly observe  $u(t)$  and all inputs to the post-synaptic  
 732 neuron. The OU process can be solved analytically using stochastic calculus, e.g. if the process (A.8) is  
 733 fixed to  $u_0$  at time 0 it evolves according to

$$u(t) = u_0 + \sigma_0 \int_0^t e^{-\frac{t-s}{\tau_m}} d\mathcal{W}(s). \quad (\text{A.9})$$

734 For long observation times the OU process converges to a stationary distribution, given by a Gaussian  
 735 with mean  $u_0$  and variance  $\sigma_0^2$ , i.e. for  $t \rightarrow \infty$ ,  $u(t) \sim \mathcal{N}(u(t) | u_0, \sigma_0^2)$ .

736 The OU process (A.8) dynamics can be used to define the generative density  $p(u, z)$  for a LIF neuron.  
 737 In the derivation of the s-FEP we make use of the fact, that also the posterior density  $p(u | z)$  can be  
 738 solved explicitly. The information about the spike times  $z$  deflects the distribution of likely values of  
 739 the membrane potential from its resting state, which is expressed in the posterior density  $p(u | z)$ . We  
 740 can express the dynamics of  $u(t)$  given the information that the membrane potential is at the firing  
 741 threshold  $\vartheta$  at the firing times  $t^{\text{post}}$ , i.e. the constraint  $u(t_1^{\text{post}}) = u_r$  and  $u(t_2^{\text{post}}) = \vartheta$  through a stochastic  
 742 process with time varying mean  $\mu(t)$  and variance  $\sigma^2(t)$ . Hence, we use a Gaussian process model of  
 743 the external state, such that the posterior density is given by

$$p(u(t) | z) = \mathcal{N}(u(t) | \mu(t), \sigma^2(t)). \quad (\text{A.10})$$

744 Using the FEP theory we can in principle assume any function  $\mu(t)$  and  $\sigma^2(t)$  and develop learning  
 745 rules that will strive to best approximate its dynamics. However, a reasonable choice will obey the  
 746 constraints imposed by the neuron and synapse dynamics, e.g. the membrane time constant and the  
 747 firing mechanism and resetting behavior of the neuron.

748 For LIF neuron model (A.8) the resulting *constraint stochastic process* has to fulfill the following  
 749 requirements

- 750 1. The mean  $\mu(t)$  obeys  $\mu(t_1^{\text{post}}) = u_r$  and  $\mu(t_2^{\text{post}}) = \vartheta$ .
- 751 2. For  $t_1^{\text{post}} < t < t_2^{\text{post}}$ ,  $\mu(t)$  approaches the resting potential  $u_0$  asymptotically.
- 752 3. The variance  $\sigma^2(t)$  obeys  $\sigma^2(t) \geq -\frac{\tau_m}{2} (\sigma^2(t))'$  for  $t_1^{\text{post}} < t < t_2^{\text{post}}$ , and approaches its minimum  
 753 when close to the firing times  $t_1^{\text{post}}$  and  $t_2^{\text{post}}$ .
- 754 4. For  $t_1^{\text{post}} < t \leq t_2^{\text{post}}$ ,  $\sigma^2(t)$  approaches the variance  $\sigma_0^2$  of the stationary distribution asymptotically.
- 755 5. The functions  $\mu(t)$  and  $\sigma^2(t)$  are smooth and follow the LIF dynamics with time constant  $\tau_m$ .

756 Constraint 3. incorporates that in the LIF dynamics, the variance can only shrink at a maximum speed  
 757 proportional to the membrane time constant  $\tau_m$ .  $(\sigma^2(t))' = \frac{d}{dt}\sigma^2(t)$  denotes the time derivative.

The LIF neuron implies OU process dynamics of the membrane potential. Given the information that  
 the membrane potential is at the firing threshold  $\vartheta$  at the firing times  $t^{\text{post}}$ , i.e. the constraint  $u(t_1^{\text{post}}) = u_r$   
 and  $u(t_2^{\text{post}}) = \vartheta$ , the OU process can be solved explicitly. The solution to this double constraint stochastic  
 process is the OU-bridge process [Corlay, 2013, Szavits-Nossan and Evans, 2015]. For any neighboring  
 postsynaptic spike pair  $(t_1^{\text{post}}, t_2^{\text{post}})$  and time point  $t$  with  $t_1^{\text{post}} < t \leq t_2^{\text{post}}$  we can describe the dynamics  
 of  $u(t)$  using its mean  $\mu(t)$  and variance  $\sigma^2(t)$ . Using this result, for any neighboring postsynaptic spike  
 pair  $(t_1^{\text{post}}, t_2^{\text{post}})$  and time point  $t$  with  $t_1^{\text{post}} < t \leq t_2^{\text{post}}$  we describe the dynamics of  $u(t)$  using the mean  
 $\mu(t)$  and variance function  $\sigma^2(t)$ , given by

$$\mu(t) = \langle u(t) \rangle = \mu(\Delta t_1, \Delta t_2) = u_0 + (u_r - u_0) \frac{e^{\frac{\Delta t_1}{\tau_m}} - e^{-\frac{\Delta t_1}{\tau_m}}}{e^{\frac{\Delta t_2}{\tau_m}} - e^{-\frac{\Delta t_2}{\tau_m}}} + (\vartheta - u_0) \frac{e^{\frac{\Delta t_2 - \Delta t_1}{\tau_m}} - e^{-\frac{\Delta t_1 - \Delta t_2}{\tau_m}}}{e^{\frac{\Delta t_2}{\tau_m}} - e^{-\frac{\Delta t_2}{\tau_m}}} \quad (\text{A.11})$$

758 and

$$\sigma^2(t) = \langle u^2(t) \rangle - \langle u(t) \rangle^2 = \sigma^2(\Delta t_1, \Delta t_2) = \sigma_0^2 \frac{1}{1 + \gamma \left( e^{\frac{\Delta t_1 - \Delta t_2}{\tau_m}} + e^{-\frac{\Delta t_1}{\tau_m}} \right)}, \quad (\text{A.12})$$

759 where  $\Delta t_1 = t_2^{\text{post}} - t$ ,  $\Delta t_2 = t_2^{\text{post}} - t_1^{\text{post}}$  and  $\gamma$  is a constant that scales the slope of the variance function.  
 760 In other words, the dynamics of the membrane potential subject to the constraint  $u(t_1^{\text{post}}) = u_r$  and  
 761  $u(t_2^{\text{post}}) = \vartheta$  are described by a stochastic process with mean  $\mu(t)$  and variance  $\sigma^2(t)$ . The membrane  
 762 potential mean and variance functions (A.11) and (A.12) are piece-wise defined for all postsynaptic spike  
 763 intervals  $(t_n^{\text{post}}, t_{n+1}^{\text{post}})$ . The membrane dynamics during each interval are statistically independent of each  
 764 other due to the resetting behavior of the neuron model. In all simulations we used  $\gamma = 50$  and  $\sigma_0^2 = 16$ .

765 The mean function  $\mu(t)$  in (A.11) is identical to the OU-bridge process model [Corlay, 2013, Szavits-  
766 Nossan and Evans, 2015]. This function describes the asymptotic approach to the resting potential  $u_0$   
767 and the slope towards the firing threshold  $\vartheta$ . The variance function  $\sigma^2(t)$  in (A.12) is flatter than the  
768 direct solution of the OU-bridge process model to incorporate the additional constraint 3.

769 Using the definition (A.11) and (A.12), we find that the posterior of the generative density can be  
770 evaluated at any time point  $t$ , as  $p(u(t) | z) = \mathcal{N}(u(t) | \mu(t), \sigma^2(t))$ . Furthermore, since the mean (A.11)  
771 and variance (A.12) functions only depend on the relative spike timing  $\Delta t_1$  and  $\Delta t_2$  we find that these  
772 quantities can be expressed in the form  $\mu(\Delta t_1, \Delta t_2)$  and  $\sigma^2(\Delta t_1, \Delta t_2)$ .

### 773 A.3 The recognition density

774 Here we define the recognition density  $q_w(u)$  for our synapse model. A synapse injects brief stochastic  
775 current pulses of amplitude proportional to the current value of the synaptic efficacy into the post-  
776 synaptic neuron when a pre-synaptic input arrives. For the derivation that follows we will use here  
777 the simplifying assumption that  $y(t)$  is given by the PSCs of a single synapse to keep the notation  
778 uncluttered. In Supplementary Text A.5 we will show that the same learning model also arises when the  
779 s-FEP is applied to a network of neurons with an arbitrary number of synapses.

780 Let the spike train of the pre-synaptic neuron be denoted by  $z_{pre}(t)$ , given by Dirac delta pulses  
781 centred at the pre-synaptic firing times. The post-synaptic input current  $y(t)$  is then given by

$$y(t) = z_{pre}(t) (w r_0 + \sqrt{w s_0} \epsilon(t)) , \quad (\text{A.13})$$

782 where  $w \geq 0$  is the synaptic efficacy,  $z_{pre}$  is a spike train given by Dirac delta pulses centered at pre-  
783 synaptic spike times, and  $\epsilon(t)$  is a source of independent unit variance zero mean Gaussian noise. The  
784 constant  $r_0$  and  $s_0$  scale the mean and variance of the synaptic current. We used  $r_0 = \frac{1}{2}$  and  $s_0 = r_0(1-r_0)$   
785 if not stated otherwise in accordance with previous models [Katz, 1971].

786 The stochastic synapse model (A.13) suggests that at the time points of pre-synaptic firing  $t = t^{pre}$   
787 the amplitudes of synaptic currents follow a Gaussian distribution. To make this explicit we rewrite  
788 (A.13) to get

$$y(t) = \sum_m \delta(t_m^{pre} - t) y_m , \quad q_w(y_m) = \mathcal{N}(y_m | r_0 w, s_0 w) \quad \text{and} \quad q_w(y) = \prod_m q_w(y_m) , \quad (\text{A.14})$$

789 where the sum runs over all pre-synaptic firing times. This Gaussian model, (A.14), is an approximation  
790 to previous models of stochastic synaptic release [Katz, 1971].

791 At this point it is instructive to note that the generative density, that was introduced in Supplemen-  
792 tary Text A.2, can be solved directly for  $y$ . More precisely, we will show that  $p(y | z)$  can be expressed  
793 as a Gaussian distribution with time-varying mean and variance functions  $m(t)$  and  $v(t)$ , such that  
794  $y_m \sim \mathcal{N}(y_m | m(t_m), v(t_m))$ . Therefore, the generative density can be inverted, yielding a time varying  
795 distribution over PSCs  $y(t)$  that, when injected into the post-synaptic neuron, will give the desired

796 distribution for the membrane potential dynamics. This result can be obtained by stochastic integra-  
 797 tion, but to keep this paper self-contained we provide a proof here. We start by considering a general  
 798 drift-diffusion process and then show the special case of the LIF neuron dynamics step by step.

799 In general, the evolution of the probability density function  $p(u, t)$  of a stochastic process  $u$  at time  
 800  $t$ , with drift  $A(u, t)$  and diffusion  $B(u, t)$ , can be described by the Fokker-Planck equation

$$\frac{\partial}{\partial t} p(u, t) = - \frac{\partial}{\partial u} (A(u, t) \cdot p(u, t)) + \frac{1}{2} \frac{\partial^2}{\partial u^2} (B(u, t) \cdot p(u, t)) . \quad (\text{A.15})$$

Note that  $u$  denotes here an instantaneous value rather than whole sequences. To describe the dynamics of our model neuron we treat here the case that  $p(u, t)$  is a Gaussian distribution with time-varying mean  $\mu(t)$  and variance  $\sigma^2(t)$  functions, i.e.  $u(t) \sim \mathcal{N}(u(t) | \mu(t), \sigma^2(t))$  at any time point  $t$ , to get for the left side of (A.15)

$$\frac{\partial}{\partial t} p(u, t) = p(u, t) \left( \mu'(t) \frac{u - \mu(t)}{\sigma^2(t)} + \frac{1}{2} (\sigma^2(t))' \left( \frac{(u - \mu(t))^2}{\sigma^4(t)} - \frac{1}{\sigma^2(t)} \right) \right) ,$$

where  $\mu'(t) = \frac{d}{dt} \mu(t)$  and  $(\sigma^2(t))' = \frac{d}{dt} \sigma^2(t)$  denote the time derivatives. Furthermore we can expand the right side of (A.15) to get

$$\frac{\partial}{\partial u} (A(u, t) \cdot p(u, t)) = p(u, t) \left( \frac{\partial}{\partial u} A(u, t) - A(u, t) \frac{u - \mu(t)}{\sigma^2(t)} \right)$$

and

$$\begin{aligned} \frac{\partial^2}{\partial u^2} (B(u, t) \cdot p(u, t)) = \\ p(u, t) \left( \frac{\partial^2}{\partial u^2} B(u, t) - 2 \frac{\partial}{\partial u} B(u, t) \frac{u - \mu(t)}{\sigma^2(t)} + B(u, t) \left( \frac{(u - \mu(t))^2}{\sigma^4(t)} - \frac{1}{\sigma^2(t)} \right) \right) . \end{aligned}$$

801 Therefore, by plugging these results back into the Fokker-Planck equation (A.15), we find the condition  
 802 that has to be satisfied for functions  $A(u, t)$  and  $B(u, t)$  to be given by

$$\begin{aligned} \mu'(t) \frac{u - \mu(t)}{\sigma^2(t)} + \frac{1}{2} (\sigma^2(t))' \left( \frac{(u - \mu(t))^2}{\sigma^4(t)} - \frac{1}{\sigma^2(t)} \right) \stackrel{!}{=} \\ A(u, t) \frac{u - \mu(t)}{\sigma^2(t)} - \frac{\partial}{\partial u} A(u, t) + \frac{1}{2} \frac{\partial^2}{\partial u^2} B(u, t) - \\ \frac{\partial}{\partial u} B(u, t) \frac{u - \mu(t)}{\sigma^2(t)} + \frac{1}{2} B(u, t) \left( \frac{(u - \mu(t))^2}{\sigma^4(t)} - \frac{1}{\sigma^2(t)} \right) . \end{aligned} \quad (\text{A.16})$$

803 Clearly, the choice  $A(u, t) = \mu'(t)$ ,  $B(u, t) = (\sigma^2(t))'$  satisfies this condition for any differentiable

804 functions  $\mu(t)$  and  $\sigma^2(t)$ .

805 This last results holds in general. To arrive at the final result we replace the general drift-diffusion  
 806 dynamics with the special case of a leaky integrator with finite integration time constant  $\tau_m$  using the  
 807 ansatz  $A(u, t) = \frac{1}{\tau_m}(u_0 - u) + m(t)$  and  $B(u, t) = v(t)$ . In this case, we can make condition (A.16)  
 808 satisfied if  $\mu'(t) = \frac{1}{\tau_m}(u_0 - \mu(t)) + m(t)$  and  $(\sigma^2(t))' = v(t) - \frac{2}{\tau_m}\sigma^2(t)$ . This can be verified by plugging  
 809 this result back into (A.16)

$$\begin{aligned} & \left( \frac{1}{\tau_m}(u_0 - \mu(t)) + m(t) \right) \frac{u - \mu(t)}{\sigma^2(t)} + \frac{1}{2} \left( v(t) - \frac{2}{\tau_m}\sigma^2(t) \right) \left( \frac{(u - \mu(t))^2}{\sigma^4(t)} - \frac{1}{\sigma^2(t)} \right) \stackrel{!}{=} \\ & \left( \frac{1}{\tau_m}(u_0 - u) + m(t) \right) \frac{u - \mu(t)}{\sigma^2(t)} + \frac{1}{\tau_m} + \frac{1}{2} v(t) \left( \frac{(u - \mu(t))^2}{\sigma^4(t)} - \frac{1}{\sigma^2(t)} \right), \end{aligned}$$

810 from which the equality follows

$$\begin{aligned} \leftrightarrow & \frac{1}{\tau_m}(u_0 - \mu(t)) \frac{u - \mu(t)}{\sigma^2(t)} - \frac{1}{\tau_m} \left( \frac{(u - \mu(t))^2}{\sigma^2(t)} - 1 \right) \stackrel{!}{=} \frac{1}{\tau_m}(u_0 - u) \frac{u - \mu(t)}{\sigma^2(t)} + \frac{1}{\tau_m} \\ \leftrightarrow & (u_0 - \mu(t)) \frac{u - \mu(t)}{\sigma^2(t)} - \frac{(u - \mu(t))^2}{\sigma^2(t)} \stackrel{!}{=} (u_0 - u) \frac{u - \mu(t)}{\sigma^2(t)} \\ \leftrightarrow & (u_0 - u) \frac{u - \mu(t)}{\sigma^2(t)} \stackrel{!}{=} (u_0 - u) \frac{u - \mu(t)}{\sigma^2(t)} \quad \checkmark \end{aligned}$$

811 This proves that a stochastic process  $u$  with  $p(u, t) = \mathcal{N}(u(t) | \mu(t), \sigma^2(t))$ ,  $\mu'(t) = \frac{1}{\tau_m}(u_0 - \mu(t)) + m(t)$   
 812 and  $(\sigma^2(t))' = v(t) - \frac{2}{\tau_m}\sigma^2(t)$  is realized by a drift  $A(u, t) = \frac{1}{\tau_m}(u_0 - u) + m(t)$  and diffusion  $B(u, t) =$   
 813  $v(t)$ . Equivalently, any process  $u$  with mean  $\mu(t)$  and variance  $\sigma^2(t)$  can be realized if

$$\begin{aligned} m(t) &= \mu'(t) + \frac{1}{\tau_m}(\mu(t) - u_0), \\ v(t) &= (\sigma^2(t))' + \frac{2}{\tau_m}\sigma^2(t), \end{aligned} \tag{A.17}$$

814 and  $v(t) \geq 0$  can be satisfied for all  $t$ . This last result is used in Supplementary Text A.4 to derive the  
 815 learning rule (A.6).

816 Furthermore, by integration of this last result we find that any integrable functions  $m(t)$  and  $v(t) > 0$   
 817 yield the following dynamics for the stochastic process  $u$

$$\begin{aligned} \mu(t) &= u_0 + e^{-\frac{t}{\tau_m}} \int_0^t e^{\frac{s}{\tau_m}} a(s) ds \\ \sigma^2(t) &= e^{-\frac{2t}{\tau_m}} \int_0^t e^{\frac{2s}{\tau_m}} b(s) ds. \end{aligned} \tag{A.18}$$



818 For  $m(t) = 0$  and  $v(t) = b$  (constant) we recover the Ornstein-Uhlenbeck process dynamics.

819 Therefore, we define the posterior density  $p(y | z)$  as the distribution over  $y$  where any instantaneous  
820 value  $y_m$  at time  $t_m$  obeys

$$p(y_m | t_m, z) = \mathcal{N}(y_m | m(t_m), v(t_m)) , \quad (\text{A.19})$$

821 where  $m(t)$  and  $v(t)$  are as defined in (A.17) with  $\mu(t)$  and  $\sigma^2(t)$  given by the solution to  $p(u | z)$  as  
822 defined in (A.11) and (A.12), respectively. Clearly we can recover  $p(u | z)$  using (A.7) by marginalizing  
823 over  $y$

$$p(u | z) = \left\langle p(u | y) p(y | z) \right\rangle_y . \quad (\text{A.20})$$

#### 824 A.4 Derivation of the learning rule

825 Next we make use of the result from Supplementary Text A.2 and Supplementary Text A.3 to develop  
826 the learning rules that minimize the variational free energy (A.3). The approach that is taken here  
827 is very similar to [Kingma and Welling, 2013] and makes extensive use of the fact that the generative  
828 density  $p(u, z)$  can be expressed analytically and Bayesian posteriors can be solved in closed form. We  
829 also assume that the neuron parameters, that determine the generative density, are constant and known  
830 *a priori*, and hence do not need to be learned by the synapses (however learning rules to infer these  
831 parameters could be easily derived from the model, but are not the focus of this study). Also, other than  
832 previous applications of the FEP (e.g. [Isomura et al., 2016]), we assume that the generative density  
833  $p(u, z)$  is independent of  $w$ . While this assumption is mathematically sound and commonly made in  
834 applications of variational Bayesian methods (e.g. [Mnih and Gregor, 2014]) it is unusual in the FEP  
835 literature. In Supplementary Text A.5 we provide an additional justification of this choice for the s-FEP.

Using the assumptions and definitions outlined above, (A.5) becomes

$$\Delta w = -\frac{\partial}{\partial w} \mathcal{F}(z, w) = \frac{\partial}{\partial w} \left\langle \log \frac{p(u, z)}{q_w(u)} \right\rangle_{q_w(u)} \quad (\text{A.21})$$

$$= \frac{\partial}{\partial w} \left\langle \log \frac{p(u | z)}{q_w(u)} \right\rangle_{q_w(u)} + \frac{\partial}{\partial w} \left\langle \log p(u, z) \right\rangle_u \quad (\text{A.22})$$

$$= \frac{\partial}{\partial w} \left\langle \log \frac{p(u | z)}{q_w(u)} \right\rangle_{q_w(u)} . \quad (\text{A.23})$$

836 The first equality follows from Bayes rule and the second follows since  $\left\langle \log p(u, z) \right\rangle_u$  is constant in  $w$   
837 by construction. Next, we exploit here that the OU process model (A.8) suggests a one-to-one relation  
838 between PSC traces  $y$  and somatic membrane potentials  $u$ , that is, for a given  $y$  we can determine  $u$   
839 through a deterministic function. For the deterministic function  $u = g(y)$ , we can replace the marginal  
840 over  $q_w(u)$  in (A.23) with a marginal over  $q_w(y)$ , i.e.  $\left\langle f(u) \right\rangle_{q_w(u)} = \left\langle f(g(y)) \right\rangle_{q_w(y)}$ . This is a variant  
841 of the reparameterization trick [Kingma and Welling, 2013] that reflects here the fact that at the post-  
842 synaptic spike times  $t^{\text{post}}$ ,  $p(u, z)$  collapses to a point mass density.

Using this result we get

$$\Delta w = -\frac{\partial}{\partial w} \mathcal{F}(z, w) = \frac{\partial}{\partial w} \left\langle \log \frac{p(u|z)}{q_w(u)} \right\rangle_{q_w(u)} = \frac{\partial}{\partial w} \left\langle \log \frac{p(g(y)|z)}{q_w(g(y))} \right\rangle_{q_w(y)} \quad (\text{A.24})$$

$$= \frac{\partial}{\partial w} \left\langle \log \frac{\langle p(g(y)|y') p(y'|z) \rangle_{y'}}{\langle p(g(y)|y') q_w(y') \rangle_{y'}} \right\rangle_{q_w(y)} = \frac{\partial}{\partial w} \left\langle \log \frac{p(y|z)}{q_w(y)} \right\rangle_{q_w(y)}, \quad (\text{A.25})$$

where in the last equality we used Eq. A.7. Thus, the minimization of the variational free energy (A.1) with respect to the synaptic efficacy  $w$  of a synapse that interacts with its post-synaptic neuron, can be reduced to a gradient on the mismatch between the posterior synaptic current  $y$  given  $z$  and the recognition density  $q_w(y)$ . Finally, we use that the PSC pulses in  $y$  are independent and thus the marginal in (A.25) can be replaced by a sum over pre-synaptic firing times  $t_m^{\text{pre}}$

$$\Delta w = -\frac{\partial}{\partial w} \mathcal{F}(z, w) = \sum_m \frac{\partial}{\partial w} \left\langle \log \frac{p(y_m | t_m^{\text{pre}}, z)}{q_w(y_m)} \right\rangle_{q_w(y_m)}. \quad (\text{A.26})$$

843 Also note, that it is sufficient here to consider only the two post-synaptic spikes in  $z$ , that are directly  
 844 neighboring  $t_m^{\text{pre}}$ , to evaluate  $p(y_m | t_m^{\text{pre}}, z)$ , since the somatic membrane dynamics are independent after  
 845 the reset to  $u_r$ .

846 This result is useful, because the generative model established in Supplementary Text A.2 allows us  
 847 to express the posterior distribution  $p(y_m | t_m, z)$  in closed form. In Supplementary Text A.3 we show  
 848 in detail that a synaptic current  $y_m \sim \mathcal{N}(y_m | m(t_m), v(t_m))$  enables a synapse to realize a somatic  
 849 membrane potential  $u(t)$  that obeys the stochastic processes with mean  $\mu(t)$  and variance  $\sigma^2(t)$ , if

$$\begin{aligned} m(t) &= \mu'(t) + \frac{1}{\tau} (\mu(t) - u_0), \\ v(t) &= (\sigma^2(t))' + \frac{2}{\tau} \sigma^2(t), \end{aligned} \quad (\text{A.27})$$

850 where  $\mu(t)$  and  $\sigma^2(t)$  are as defined in (A.11) and (A.12).

To construct the term  $\frac{\partial}{\partial w} \left\langle \log \frac{p(y_m | t_m, z)}{q_w(y_m)} \right\rangle_{q_w(y)}$  of (A.26) we use the result from Supplementary

Text A.2 and assume a general Gaussian form  $y_m \sim \mathcal{N}(y_m | \mu_w, \sigma_w^2)$  to get

$$\begin{aligned}
 & \frac{\partial}{\partial w} \left\langle \log \frac{p(y_m | t_m, z)}{q_w(y_m)} \right\rangle_{q_w(y_m)} \\
 &= \frac{\partial}{\partial w} \left\langle -\frac{1}{2} \log(2\pi v(t_m)) - \frac{(y_m - m(t_m))^2}{2v(t_m)} \right\rangle_{q_w(y_m)} + \frac{1}{2} \frac{\partial}{\partial w} \log(2\pi e \sigma_w^2) \\
 &= \frac{\partial}{\partial w} \left\langle \frac{2y_m m(t_m) - y_m^2}{2v(t_m)} \right\rangle_{q_w(y_m)} + \frac{1}{2} \frac{1}{\sigma_w^2(t_m)} \frac{\partial}{\partial w} \sigma_w^2 \\
 &= \left( \frac{m(t_m)}{v(t_m)} \right) \frac{\partial}{\partial w} \langle y_m \rangle_{q_w(y_m)} - \frac{1}{2} \left( \frac{1}{v(t_m)} \right) \frac{\partial}{\partial w} \langle y_m^2 \rangle_{q_w(y_m)} + \frac{1}{2} \frac{1}{\sigma_w^2} \frac{\partial}{\partial w} \sigma_w^2. \tag{A.28}
 \end{aligned}$$

851 By plugging in (A.11) and (A.12) we recover the LTP and LTD term in (A.6).

Using  $\langle y_m \rangle_{q_w(y_m)} = \mu_w$  and  $\langle y_m^2 \rangle_{q_w(y_m)} = \mu_w^2 + \sigma_w^2$ , we get

$$\frac{\partial}{\partial w} \left\langle \log \frac{p(y_m | t_m, z)}{q_w(y_m)} \right\rangle_{q_w(y_m)} = \left( \frac{m(t_m) - \mu_w}{v(t_m)} \right) \frac{\partial}{\partial w} \mu_w - \frac{1}{2} \left( \frac{1}{v(t_m)} - \frac{1}{\sigma_w^2} \right) \frac{\partial}{\partial w} \sigma_w^2. \tag{A.29}$$

Finally, using (A.13) we identify  $\mu_w$  and  $\sigma_w^2$  to get the result for any  $t_m$  at the pre-synaptic firing times

$$\frac{\partial}{\partial w} \left\langle \log \frac{p(y_m | t_m, z)}{q_w(y_m)} \right\rangle_{q_w(y_m)} = \left( \frac{m(t_m) - r_0 w}{v(t_m)} \right) r_0 - \frac{1}{2} \left( \frac{1}{v(t_m)} - \frac{1}{w r_0 (1 - r_0)} \right) r_0 (1 - r_0) \tag{A.30}$$

$$= r_0 \frac{m(t_m)}{v(t_m)} - r_0 \frac{1}{v(t_m)} \left( \frac{1 - r_0}{2} + r_0 w \right) + \frac{1}{2w}, \tag{A.31}$$

852 which is identical to the result in (A.6) with  $W_{\text{LTP}}(\Delta t_1, \Delta t_2) = r_0 \frac{m(t_m)}{v(t_m)}$  and  $W_{\text{LTD}}(\Delta t_1, \Delta t_2) = r_0^2 \frac{1}{v(t_m)}$ .

Using this we identify the triplet STDP windows, given by

$$W_{\text{LTP}}(\Delta t_1, \Delta t_2) = r_0 \frac{\mu'(\Delta t_1, \Delta t_2) + \frac{1}{\tau} (\mu(\Delta t_1, \Delta t_2) - u_0)}{(\sigma^2(\Delta t_1, \Delta t_2))' + \frac{2}{\tau} \sigma^2(\Delta t_1, \Delta t_2)}, \tag{A.32}$$

853 and

$$W_{\text{LTD}}(\Delta t_1, \Delta t_2) = r_0^2 \frac{1}{(\sigma^2(\Delta t_1, \Delta t_2))' + \frac{2}{\tau} \sigma^2(\Delta t_1, \Delta t_2)}, \tag{A.33}$$

854 where  $\mu(\Delta t_1, \Delta t_2)$  and  $\sigma^2(\Delta t_1, \Delta t_2)$ , respectively, are the estimated mean and variance of the membrane  
 855 potential based on the back-propagating action potentials ((A.11) and (A.12)), and  $\mu'(t) = \frac{d}{dt} \mu(t)$  and  
 856  $(\sigma^2(t))' = \frac{d}{dt} \sigma^2(t)$  denote the time derivatives.

857 The rationale underlying the learning model is illustrated in Fig. 2A. For any pre-synaptic firing time  
 858  $t_m$  a random PSC is generated using the recognition density  $q_w(y_m)$ . In addition post-pre-post spike  
 859 triplets are formed by considering the neighbouring post-synaptic spikes back-propagating to the synapse.  
 860 Based on these spike triplets, the posterior density  $p(y_m | t_m, z)$  is constructed and the mismatch with

861 the recognition density triggers a weight update. The internal model does not need to be represented  
 862 explicitly but is implicit in the shape of the triplet STDP learning window.

863 The proposed s-FEP learning rules installs a single parameter distribution  $q_w(y)$  that minimizes  
 864 the distance to the two-parameter posterior density  $y \sim \mathcal{N}(y | m(t), v(t))$ . In Fig. 3E we showed that  
 865 the synaptic efficacies are correlated with the euclidean norm of the posterior  $\mu^*$  and  $\sigma^*$ . Using the  
 866 result (A.31) we can make a more careful analysis, by keeping the PSC posterior fixed,  $m(t) = \mu^*$  and  
 867  $v(t) = (\sigma^*)^2$ , and then analyzing the roots of the learning rule (A.31). Using this we find that the  
 868 weights converge to  $w^* = \frac{1}{2}(\mu^* - \frac{1}{2}) + \frac{1}{2}\sqrt{(\mu^* - \frac{1}{2})^2 + (2\sigma^*)^2}$ , (with  $r_0 = \frac{1}{2}$  as in our simulations).  
 869 Hence, weights encode both the target mean and variances, i.e. for small  $\sigma^*$  and large  $\mu^*$  we have  
 870  $w^* \approx \mu^*$  and for large  $\sigma^*$  and small  $\mu^*$  we have  $w^* \approx \sigma^*$ .

## 871 A.5 Network level FEP emerges from the s-FEP

872 In the previous sections we have derived the s-FEP for a single synapse for the sake of illustration.  
 873 Clearly this is a very limiting case and in general we are interested in a FEP that concerns arbitrarily  
 874 large recurrent neural networks. In this section we thus turn to a network-level treatment of the s-FEP.  
 875 We show that the same learning rules (A.23) also applies to a class of learning problems and networks of  
 876 neurons with an arbitrary number of neurons and synapses. To show this we use here vectorized forms  
 877  $\mathbf{z} = (z_1, \dots, z_K)$ ,  $\mathbf{u} = (u_1, \dots, u_K)$ ,  $\mathbf{y} = (y_1, \dots, y_K)$  and  $\mathbf{w} = (w_{11}, \dots, w_{KK})$  to denote ordered sets of  
 878 network spikes, membrane potentials, PSCs and the synaptic efficacies, respectively, for networks of  $K$   
 879 neurons.  $w_{ki}$  denotes the synaptic efficacy from neuron  $i$  to neuron  $k$ .

880 In addition we assume that there is an additional external feedback  $\mathbf{x}$  that may influence the activity  
 881 of an arbitrary subset of network neurons. This feedback is assumed to be a sensory experience of  
 882 some form that is directly perceptible by a subset of the neurons. The feedback may take the role of  
 883 a teacher signal as in our example in Fig. 5, but it can also be a more abstract signal that indicates  
 884 e.g. goal reaching or aversive stimuli. Subsequently we will take the free energy minimization problem  
 885 to the network level by considering the network spikes  $\mathbf{z}$  as part of the state space and minimizing the  
 886 augmented variational free energy

$$887 \mathcal{F}(\mathbf{x}, \mathbf{w}) = \left\langle \log \frac{q_{\mathbf{w}}(\mathbf{u}, \mathbf{z})}{p(\mathbf{u}, \mathbf{x}, \mathbf{z})} \right\rangle_{q_{\mathbf{w}}(\mathbf{u}, \mathbf{z})} . \quad (\text{A.34})$$

887 **The network-level generative density.** The corresponding generative density  $p(\mathbf{u}, \mathbf{x}, \mathbf{z})$  now cap-  
 888 tures the dependence between states  $(\mathbf{u}, \mathbf{z})$  and feedback  $\mathbf{x}$ .  $\mathbf{x}$  can in principle be an arbitrary vector-  
 889 valued function of time, but as in the single synapse case we focus here on models where the posterior  
 890 density can be solved and results in conditional independence between individual membrane potentials  
 891  $u_k$

$$891 p(\mathbf{u} | \mathbf{x}, \mathbf{z}) = \prod_k p(u_k | \mathbf{x}, \mathbf{z}) . \quad (\text{A.35})$$

892 The following derivations will be valid for scenarios where this posterior density can be evaluated.  $\mathbf{x}$   
 893 can for example be given by strong external inputs that impose a certain firing pattern on a subset of  
 894 network neurons or a bias potential that offsets the resting potential of some neurons. Scenarios where  
 895 the independence (A.35) does not hold lead to more complex learning rules that are not further studies  
 896 here (see the discussion at the end of this section).

897 As in the single synapse case we can make use of another conditional independence that is imposed  
 898 by the neuron's resetting behavior at post-synaptic firing times. This implies conditional independence  
 899 between any two post-synaptic spike times  $t_{k,n-1}^{\text{post}}, t_{k,n}^{\text{post}}$ . To make this explicit we denote by  $u_{k,n} =$   
 900  $u_k(t_{k,n-1}^{\text{post}} \dots t_{k,n}^{\text{post}})$  and  $\mathbf{z}_{k,n} = \mathbf{z}(t_{k,n-1}^{\text{post}} \dots t_{k,n}^{\text{post}})$  subsets of the sequences  $u_k$  and  $\mathbf{z}$ , respectively, over the  
 901 time interval  $t_{k,n-1}^{\text{post}} \leq t < t_{k,n}^{\text{post}}$ . Using this we can write for (A.35)

$$p(\mathbf{u} | \mathbf{x}, \mathbf{z}) = \prod_{k,n} p(u_{k,n} | \mathbf{x}, \mathbf{z}_{k,n}) . \quad (\text{A.36})$$

**The network-level recognition density.** For the single synapse model we assumed the pre-synaptic spikes to be given, which considerably simplified the derivations. This is not possible anymore for the network-level model, which also has to reflect the recurrent input from network spikes  $\mathbf{z}$  from other neurons. To account for this additional dynamics we consider the network-level PSCs,  $y_k(t)$  of neuron  $k$

$$y_k(t) = \sum_{i \setminus k} y_{ki}(t) = \sum_{i \setminus k, m} \delta(t_{i,m}^{\text{pre}} - t) y_{ki,m} , \quad \text{with} \quad q_{w_{ki}}(y_{ki,m}) = \mathcal{N}(y_{ki,m} | r_0 w_{ki}, s_0 w_{ki}) , \quad (\text{A.37})$$

$$\text{and} \quad q_{\mathbf{w}}(y_{k,n} | \mathbf{z}_{k,n}) = \prod_{i \setminus k} \prod_{m: t_{k,n-1}^{\text{post}} \leq t_{i,m}^{\text{pre}} < t_{k,n}^{\text{post}}} q_{w_{ki}}(y_{ki,m}) \quad (\text{A.38})$$

902 where the sum over  $i$  runs over all network neurons excluding  $k$  (fully recurrent network without au-  
 903 tapses).  $y_{ki,m}$  denotes the PSC amplitude of the  $m$ -th PSC event under synapse  $ki$ , and  $y_{k,n}$  denotes  
 904 the whole PSC sequence of neuron  $k$  in the time interval  $t_{k,n-1}^{\text{post}} \leq t_{i,m}^{\text{pre}} < t_{k,n}^{\text{post}}$ . The pre-synaptic firing  
 905 times  $t_{i,m}^{\text{pre}} = t_{i,m}^{\text{post}} + T_s$ , denote the recurrent network activity with some small time delay  $T_s$ . Eq. (A.38)  
 906 includes the implicit assumption that no pre-synaptic spikes arrive at neuron  $k$  at the exact same time  
 907  $t_{i,m}^{\text{pre}}$  such that the conditional independence holds (further discussed at the end of this section).

The network-level recognition density determines the response of the network to the PSCs (A.38). To define the network-level recognition density, we can make use of the fact that the neuron model is Markovian, which allows us to define  $q_{\mathbf{w}}(\mathbf{u}, \mathbf{z})$  in terms of a distribution over individual network spike times  $t_{k,n}^{\text{post}}$

$$q_{\mathbf{w}}(\mathbf{u}, \mathbf{z}) = \prod_{k,n} q_{\mathbf{w}}(u_{k,n}, t_{k,n}^{\text{post}} | \mathbf{z}_{k,n}) = \prod_{k,n} \left\langle p(u_{k,n} | y_{k,n}') p(t_{k,n}^{\text{post}} | y_{k,n}') q_{\mathbf{w}}(y_{k,n}' | \mathbf{z}_{k,n}) \right\rangle_{y_{k,n}'},$$

$$\text{and equivalently} \quad q_{\mathbf{w}}(\mathbf{y}, \mathbf{z}) = \prod_{k,n} p(t_{k,n}^{\text{post}} | y_{k,n}) q_{\mathbf{w}}(y_{k,n} | \mathbf{z}_{k,n}) , \quad (\text{A.39})$$

908 where  $p(t_{k,n}^{\text{post}} | y_{k,n})$  is the probability density over firing time  $t_{k,n}^{\text{post}}$  in response to given PSCs  $y_{k,n}$ , given

909 by a point density similar to (A.7), where the membrane potential reaches the firing threshold exactly  
 910 at time  $t_{k,n}^{\text{post}}$ .

Using this result we get for the network level synaptic efficacy updates

$$-\frac{\partial}{\partial w_{li}} \mathcal{F}(\mathbf{x}, \mathbf{w}) = \frac{\partial}{\partial w_{li}} \left\langle \log \frac{p(\mathbf{u}, \mathbf{x}, \mathbf{z})}{q_{\mathbf{w}}(\mathbf{u}, \mathbf{z})} \right\rangle_{q_{\mathbf{w}}(\mathbf{u}, \mathbf{z})} = \frac{\partial}{\partial w_{li}} \left\langle \log \frac{p(\mathbf{u}, \mathbf{z} | \mathbf{x})}{q_{\mathbf{w}}(\mathbf{u}, \mathbf{z})} \right\rangle_{q_{\mathbf{w}}(\mathbf{u}, \mathbf{z})} \quad (\text{A.40})$$

$$= \frac{\partial}{\partial w_{li}} \left\langle \sum_{k,n} \log \frac{p(u_{k,n}, t_{k,n}^{\text{post}} | \mathbf{x}, \mathbf{z}_{k,n})}{q_{\mathbf{w}}(u_{k,n}, t_{k,n}^{\text{post}} | \mathbf{z}_{k,n})} \right\rangle_{q_{\mathbf{w}}(\mathbf{u}, \mathbf{z})}, \quad (\text{A.41})$$

where in (A.40) we used that the derivative of  $\langle p(\mathbf{u}, \mathbf{x}, \mathbf{z}) \rangle_{\mathbf{u}, \mathbf{z}}$  with respect to  $w_{li}$  is zero by construction. Again by exploiting the properties of (A.39) we can use reparameterization to replace the marginal over  $u$  with one over  $y$ . For (A.41) we get

$$\begin{aligned} -\frac{\partial}{\partial w_{li}} \mathcal{F}(\mathbf{x}, \mathbf{w}) &= \frac{\partial}{\partial w_{li}} \left\langle \sum_{k,n} \log \frac{p(u_{k,n}, t_{k,n}^{\text{post}} | \mathbf{x}, \mathbf{z}_{k,n})}{q_{\mathbf{w}}(u_{k,n}, t_{k,n}^{\text{post}} | \mathbf{z}_{k,n})} \right\rangle_{q_{\mathbf{w}}(\mathbf{u}, \mathbf{z})} = \\ &= \frac{\partial}{\partial w_{li}} \left\langle \sum_{k,n} \log \frac{\langle p(g(y_{k,n}) | y'_{k,n}) p(t_{k,n}^{\text{post}} | y'_{k,n}) p(y'_{k,n} | \mathbf{x}, \mathbf{z}_{k,n}) \rangle_{y'_{k,n}}}{\langle p(g(y_{k,n}) | y'_{k,n}) p(t_{k,n}^{\text{post}} | y'_{k,n}) q_{\mathbf{w}}(y'_{k,n} | \mathbf{z}_{k,n}) \rangle_{y'_{k,n}}} \right\rangle_{q_{\mathbf{w}}(\mathbf{y}, \mathbf{z})} = \\ &= \frac{\partial}{\partial w_{li}} \left\langle \sum_{k,n} \log \frac{p(y_{k,n} | \mathbf{x}, \mathbf{z}_{k,n})}{q_{\mathbf{w}}(y_{k,n} | \mathbf{z}_{k,n})} \right\rangle_{q_{\mathbf{w}}(\mathbf{y}, \mathbf{z})}. \end{aligned} \quad (\text{A.42})$$

Note that the information about  $\mathbf{z}$  is redundantly encoded in  $\mathbf{u}$  and therefore this dependence vanishes under the expectation. Finally, using this result and (A.38), we identify the synaptic efficacy updates for  $w_{li}$

$$\begin{aligned} \Delta w_{li} &= -\frac{\partial}{\partial w_{li}} \mathcal{F}(\mathbf{x}, \mathbf{w}) = \frac{\partial}{\partial w_{li}} \left\langle \sum_{k,n} \log \frac{p(y_{k,n} | \mathbf{x}, \mathbf{z}_{k,n})}{q_{\mathbf{w}}(y_{k,n} | \mathbf{z}_{k,n})} \right\rangle_{q_{\mathbf{w}}(\mathbf{y}, \mathbf{z})} = \\ &= \frac{\partial}{\partial w_{li}} \left\langle \sum_n \log \frac{p(y_{l,n} | \mathbf{x}, \mathbf{z}_{l,n})}{q_{\mathbf{w}}(y_{l,n} | \mathbf{z}_{l,n})} \right\rangle_{q_{\mathbf{w}}(\mathbf{y}, \mathbf{z})} = \\ &= \frac{\partial}{\partial w_{li}} \left\langle \sum_n \sum_{m: t_{l,n-1}^{\text{post}} < t_{i,m}^{\text{pre}} \leq t_{l,n}^{\text{post}}} \log \frac{p(y_{li,m} | t_{i,m}^{\text{pre}}, \mathbf{x}, \mathbf{z}_{l,n})}{q_{w_{li}}(y_{li,m})} \right\rangle_{q_{\mathbf{w}}(\mathbf{y}, \mathbf{z})}, \end{aligned} \quad (\text{A.43})$$

911 where  $p(y_{li,m} | t_{i,m}^{\text{pre}}, \mathbf{x}, \mathbf{z}_{l,n})$  is the posterior density over PSCs evaluated at time  $t_{i,m}^{\text{pre}}$ .

A sampling-based approximation of (A.44) can be realized by first, sampling  $\mathbf{y}, \mathbf{z} \sim q_{\mathbf{w}}(\mathbf{y}, \mathbf{z})$  by letting the network evolve according to its intrinsic dynamics. Then, update the synaptic efficacies for



every post-pre-post spike according to

$$\Delta w_{li} = \frac{\partial}{\partial w_{li}} \left\langle \log \frac{p(y_{li,m} | t_{i,m}^{\text{pre}}, \mathbf{x}, \mathbf{z}_{l,n})}{q_{w_{li}}(y_{li,m})} \right\rangle_{q_{w_{li}}(y_{li,m})}. \quad (\text{A.44})$$

912 In summary we find that network-level learning can be established in the from (A.44) if the following  
 913 assumptions hold

- 914 • Network spikes never arrive simultaneously so that the conditional independence in (A.38) applies.
- 915 • The posterior of the generative density  $p(y_{li,m} | t_{i,m}^{\text{pre}}, \mathbf{x}, \mathbf{z}_{l,n})$  can be computed in the synapses  
 916 (realized through the learning rules).

917 The first assumption is easy to fulfill for a general recurrent network since the theoretical framework  
 918 leaves enough room to de-correlate input spikes. Note, that the probability that any two neurons spike  
 919 exactly at the same time already approaches zero in continuous time if spikes are generated indepen-  
 920 dently in every neuron. More complex cases like multiple input synapses from the same neuron can  
 921 be treated by including a small independent jitter on the synaptic delays. In our simulations we found  
 922 that simultaneous arrival of input spikes does not seem to be problematic in practice and no additional  
 923 measures were taken to prevent them.

924 The second assumption is clearly only true for special cases where the implied conditional indepen-  
 925 dence holds. In Fig. 4 and 5 we chose the most basic example for this to be true. There, we used a simple  
 926 model where  $\mathbf{x}$  provided external input to drive a subset of neurons to fire at externally defined time  
 927 points (e.g. through external sensory inputs that provide strong inputs to some neurons). In this simple  
 928 example  $p(y_{li,m} | t_{i,m}^{\text{pre}}, \mathbf{x}, \mathbf{z}_{l,n})$  in (A.44) can be expressed analogously to Eq. (A.19) and the resulting  
 929 learning rules are identical to (3) with the only difference that spike times are generated by the intrinsic  
 930 dynamics  $q_{\mathbf{w}}(\mathbf{y}, \mathbf{z})$  for neurons that are not driven externally by  $\mathbf{x}$ . In more complex scenarios the  
 931 posterior can be realized through additional learning mechanism, e.g. through neuromodulatory signals,  
 932 as previously studied in [Isomura et al., 2016].

933 **Reasons against a weight-dependent generative density for the s-FEP.** Our derivations rely  
 934 on the assumption that the generative density is independent of the synaptic efficacies  $\mathbf{w}$ . This implies  
 935 that the generative- and the recognition density have separate parameter spaces. While this assumption  
 936 is mathematically sound and has been used in many previous applications of variational Bayes (e.g. [Mnih  
 937 and Gregor, 2014]) it is less common in the FEP literature. However, we argue here that in the context  
 938 of the s-FEP, a weight-dependent generative density  $p_{\mathbf{w}}(\mathbf{u}, \mathbf{x}, \mathbf{z})$  would not be beneficial computationally  
 939 and also would not improve biological realism.

940 On the computational side, we find the main difference that the term  $\frac{\partial}{\partial w_{li}} \left\langle \log p_{\mathbf{w}}(\mathbf{u}, \mathbf{x}, \mathbf{z}) \right\rangle_{\mathbf{u}}$  would  
 941 not vanish in (A.41) and therefore this gradient has to be estimated in every synapse. It is well known that  
 942 this kind of gradients is notoriously hard to compute and suffers from adverse signal-to-noise properties

943 [Mnih and Gregor, 2014]. For the case of the s-FEP the situation is even worse because the learning  
944 signal has to be estimated based on the sparse bAPs that arrive at the synapse. The effect of a single  
945 synapse onto the somatic membrane potential is so minuscule that detecting this effect using a sampling-  
946 based estimator would require an unreasonable number of samples before it converges to a meaningful  
947 estimate of the gradient. An explicit dependence between the s-FEP generative density of the somatic  
948 membrane potential and all synaptic efficacies does not seem to be biologically feasible either, because  
949 it would require every synapse in a neuron to have knowledge about the PSCs of all other synapses.

950 For these reasons we decided to pursue a model-based, bottom-up approach to estimate the s-FEP  
951 gradient by splitting the parameter space of the recognition- and the generative density. Therefore,  
952 synapses maintain only a minimal model of the soma that reflects the high uncertainty of the synapse  
953 due to the sparse feedback. This has the advantage that the solution of the s-FEP can be expressed  
954 directly in closed form and manifests in learning rules that only require variables that are locally available  
955 at the synapse. Our derivation does not require further approximations such as linearizations to develop  
956 this result. Despite the simplicity of the generative model that is locally maintained in every synapse, we  
957 show in simulations (Fig. 4 and 5) and theory (Supplementary Text A.5) that the s-FEP can be scaled  
958 up to the level of recurrent networks.
